# Supplementary material for: Age-Related Changes of Gene Expression Profiles in Drosophila
Source: Genes (Basel). 2021 Dec 14;12(12):1982. doi: 10.3390/genes12121982 (PMC8701748; doi:10.3390/genes12121982)
Supplement: Supplementary file 1 [file genes-12-01982-s001.zip › Bordet_ Supplementary Table S1.xlsx]

## Sheet: Sheet1
EntrezID	Name	Young1	Young2	Young3	Old1	Old2	Old3
30972	CG13377	10.2579	11.142	10.6846	9.71146	9.54138	9.4171
30979	CG3777	4.90703	6.65374	7.55455	2.54934	2.51282	2.54227
30996	CG17778	5.94466	6.92495	6.82535	7.77077	8.03406	9.16467
31025	CG13360	8.24629	7.77341	8.24865	3.18007	3.14239	3.67934
31060	CG11378	8.30311	9.02059	9.17427	9.75564	10.1178	10.3215
31067	CG11381	12.9936	12.9604	12.8316	10.4097	6.73732	2.20807
31080	Tsp2A	10.0085	10.1021	10.8123	13.0769	13.163	13.2772
31111	Mur2B	11.2802	10.9457	11.0197	6.0783	3.3454	2.08055
31121	CG32809	8.4639	8.45858	8.21358	9.72643	9.95768	9.73472
31168	moody	10.0946	10.3329	10.5154	11.4625	11.8913	11.8668
31195	Nmd3	11.6571	11.5874	11.8257	10.3404	10.7537	10.3164
31218	CG14050	2.02693	2.01625	2.05437	3.44944	2.81775	4.95678
31269	Syx4	9.46861	9.8597	9.45521	11.328	11.4954	11.6629
31290	rst	8.79275	9.27728	9.06452	10.4548	10.3979	10.3994
31294	Fcp3C	13.5585	13.6915	13.4929	11.6249	2.00442	6.309
31328	Ilp7	5.08243	3.06989	2.96084	1.90096	1.91113	1.91487
31365	CG15571	12.4679	12.989	12.9041	10.3692	7.28119	2.18303
31366	CG15570	4.96833	5.34867	5.14786	2.30139	2.24177	2.15515
31368	Muc4B	12.8078	12.712	12.4395	8.52203	2.57017	2.04741
31394	pon	2.75751	2.6132	2.46455	4.75119	3.94737	4.59157
31457	NAAT1	3.97499	4.53385	4.17363	4.73233	6.58092	6.09025
31461	CG15784	11.0144	11.7176	11.7961	13.9664	14.2731	14.323
31464	frma	4.82668	4.37967	4.68538	6.29445	5.62958	6.79798
31503	CG3097	7.92771	8.3827	8.56544	9.23822	9.23101	9.56923
31509	CG12239	3.97645	4.92038	4.95748	7.20951	7.66313	7.67678
31526	CG12728	6.26389	5.64466	6.15512	9.93384	10.306	10.4875
31527	CG6041	4.22131	4.37337	4.24859	8.83706	8.91541	9.4409
31540	Tsp5D	9.56023	10.2034	10.3696	8.0308	8.00861	8.17655
31573	CG3823	4.30056	5.62674	5.60774	2.63586	2.56919	2.98973
31593	Pat1	11.9274	12.0609	11.7615	10.8137	10.8456	10.8851
31641	CG4586	10.7755	10.57	10.8252	9.43382	9.57227	9.4107
31644	bou	9.23391	8.22623	8.63185	6.88888	6.51194	6.35942
31672	CheA7a	5.8357	5.39929	5.03455	4.29774	2.44557	3.78725
31692	Ir7c	10.6942	10.4204	10.5049	5.73559	2.37173	2.39363
31713	Ubr3	3.73535	3.89277	3.95806	5.36438	4.75715	5.19648
31739	CG17982	3.87458	3.094	3.97202	4.86191	5.48444	5.2756
31762	ND75	11.6225	11.6824	11.6333	10.5617	10.6428	10.3924
31779	CG15347	10.3335	11.1351	11.5858	13.124	13.4574	13.4048
31786	Cp7Fc	12.8974	13.0804	13.203	9.93821	5.85171	2.19278
31792	Nrg	4.89444	5.44564	5.39093	6.26052	6.61528	5.99561
31797	spirit	1.72038	1.8294	2.16215	2.72273	4.66184	3.62245
31798	CG12065	5.32316	5.33995	5.68843	7.07135	7.42302	7.24524
31824	CG10962	9.0814	8.77855	9.24432	10.3895	9.70028	10.7683
31824	CG10962	9.0814	8.77855	9.24432	10.3895	9.70028	10.7683
31831	CG44325	11.3022	12.0297	11.9256	12.6051	12.9945	12.7039
31854	CG12057	11.8829	12.316	11.5672	6.45053	2.21454	2.2324
31918	CG32695	8.27032	8.20225	8.28053	10.3101	10.2399	10.5411
31920	cg1468	10.8588	11.4934	12.1654	13.1869	12.8735	13.5576
31921	CG9686	2.61858	3.67351	3.07411	5.08252	5.91781	5.32161
31922	CG9689	2.50916	2.63804	2.77433	4.21798	5.97847	4.77549
31923	CG9691	9.04223	9.01896	8.4554	9.75071	9.73132	10.1354
31928	CG1889	3.44291	6.15645	5.10017	2.0845	2.2413	2.14066
31945	Tequila	11.4881	11.4615	11.3348	9.46476	8.97382	9.33366
32002	Rph	3.10405	3.16704	3.15524	5.14361	5.72122	6.52333
32006	CG15211	11.2879	11.5651	11.1865	12.2868	12.268	12.4942
32040	Vago	10.4884	11.5789	11.7329	13.3766	13.7391	13.2676
32041	CG2076	7.89564	8.05445	8.05354	8.83789	9.30213	9.04316
32043	CG42249	10.6416	11.0656	10.6507	9.33797	9.61435	9.10247
32052	CG15202	7.32508	8.42044	7.58632	5.57571	5.26791	5.13987
32076	CG11752	10.2685	10.5977	10.0438	9.6851	9.08539	9.12542
32090	HP5	5.66377	6.52372	6.56494	7.85	7.39255	7.78548
32093	Cyp4g15	4.72473	5.49374	5.22683	5.88825	6.66153	6.20692
32099	PGRP-SA	3.9528	5.18705	8.12018	11.017	11.4581	11.1099
32107	nod	9.09507	9.57855	9.29772	10.0985	10.3534	10.5215
32108	CG1561	8.81202	8.78567	9.31016	6.91598	6.90599	6.71649
32146	CG15739	9.36719	9.34148	9.76175	11.5522	11.7488	11.8344
32176	moon	8.43607	8.51477	8.12081	6.76365	6.41357	6.40943
32191	Pkcdelta	7.20327	7.98134	7.5745	4.3059	4.32217	4.43991
32248	CG12716	10.7674	10.7969	10.6754	5.39047	2.45198	2.44813
32263	MFS10	4.87334	5.15233	5.95857	6.14965	6.86224	7.16403
32264	CG32645	10.2869	9.96931	9.66465	4.9773	4.36929	2.84326
32283	IP3K2	8.69592	8.56918	8.4222	9.44788	9.47794	9.77451
32312	Tango13	5.23731	6.12779	6.5081	7.19369	6.8939	7.33942
32314	up	13.4631	13.6128	13.532	12.3147	11.6024	11.5972
32326	CG12177	10.4391	10.3815	10.3285	8.30782	8.5215	8.26024
32329	NnaD	9.8626	9.92416	9.31726	6.12986	5.43219	5.4868
32340	rdgB	7.72632	9.06186	8.32917	9.18961	9.51934	9.57524
32361	CG1368	6.72159	7.00256	6.63502	2.59935	1.90285	1.91847
32384	Muc12Ea	11.6853	11.4909	11.6231	6.2567	4.21057	2.0687
32385	CG9400	7.33243	8.59595	7.28481	3.71634	3.26066	2.72712
32387	dpr8	4.20594	4.67437	3.96253	5.15889	5.77662	5.34039
32398	NetA	3.31117	3.27064	3.06936	4.7347	5.39596	5.56573
32401	CG15890	6.62806	6.98011	6.70098	3.93696	3.81509	3.89085
32407	CG14408	3.73585	3.92867	4.082	4.90487	5.17201	5.26537
32409	CG14410	3.66796	2.80512	3.23502	3.97072	5.32021	5.50101
32420	fiz	8.88094	9.10029	9.91849	8.38681	7.55864	7.79044
32422	CG12398	8.95695	9.1318	9.95722	2.45083	2.93884	2.23894
32434	ND-B18	10.0375	10.4128	10.4573	9.2229	9.10157	8.55336
32495	CG8097	9.68706	9.85474	9.7924	11.0312	10.9307	11.0946
32498	sog	6.2995	6.401	6.45895	7.06044	7.88121	7.46356
32506	Pis	7.10611	7.65835	7.41393	8.34417	8.4639	8.58447
32531	Rhp	6.65817	5.54517	6.31702	7.21874	7.37626	7.08707
32610	CG4301	2.87999	2.80012	3.16143	4.75231	5.7444	5.97441
32611	Traf-like	10.5653	10.7481	10.4404	11.5546	11.7509	11.7636
32641	CG15865	2.20829	2.05204	2.29222	4.77578	5.99941	6.0404
32648	spheroide	2.36244	2.32758	2.53023	4.74061	4.77986	5.77112
32649	CG9673	9.32207	10.3978	10.6855	11.2211	11.4269	11.2759
32657	CG32572	2.84797	3.01445	3.28426	4.95892	5.34468	5.68124
32675	CG13003	3.9321	4.43169	3.67986	2.8261	2.47869	2.92886
32696	Arpc3B	6.95982	8.76221	8.89405	11.5349	12.0873	12.1518
32698	CG5004	7.19472	7.93298	7.61814	8.9368	8.70087	9.24934
32705	CG5070	2.59476	2.14573	2.27711	6.10769	8.5054	7.16386
32709	CG5162	8.8817	8.9426	9.01006	7.3156	7.24532	7.59457
32710	CG12998	10.4606	11.079	11.27	3.80356	1.79768	1.83935
32718	F	6.70866	7.90722	6.20664	4.97481	2.91366	3.71441
32720	CG8661	8.70808	8.41986	8.2597	4.20824	3.39164	4.4868
32739	Corolla	4.51855	3.96386	3.00237	5.66417	5.18309	5.20636
32768	CG6762	2.30421	2.3971	2.91686	4.1695	4.45724	4.45947
32780	Sh	5.04895	6.89843	6.26343	4.24791	4.61335	4.47294
32780	Sh	5.04895	6.89843	6.26343	4.24791	4.61335	4.47294
32780	Sh	5.04895	6.89843	6.26343	4.24791	4.61335	4.47294
32790	RhoGAP16F	5.76804	5.23883	5.42791	7.28175	7.3915	7.59719
32794	wupA	13.8199	13.9026	13.8474	12.8132	12.5907	12.6775
32831	Hayan	2.99927	3.74919	5.62494	8.17866	7.64435	8.3694
32834	CG15044	8.77209	9.28904	10.2831	11.1162	11.231	11.1255
32835	CG15043	9.7087	11.0474	11.1004	12.8452	13.0586	12.9847
32858	Cyp18a1	10.2147	10.3571	9.89629	9.20193	8.74912	9.04842
32897	Obp18a	10.0377	9.83491	10.0785	11.1753	11.232	11.5543
32905	Mec2	3.12689	4.1763	4.49904	9.01717	9.72164	9.48555
32906	HP1D3csd	1.98457	2.01847	2.0062	5.0509	6.49816	5.17939
32917	CG7992	6.14891	6.59203	6.77271	8.53117	8.57075	8.92486
32925	snmRNA:763	4.50914	4.56049	4.81639	5.90255	6.86916	7.17935
32936	ND-18	9.42966	9.46201	9.21982	7.71661	7.5385	7.16109
33001	THADA	6.95397	6.42516	6.39259	4.94889	5.3632	5.47199
33005	Nep3	6.96581	8.50404	8.03058	9.14095	9.175	9.32266
33013	CG9572	4.6778	5.44939	4.8216	3.13857	2.13525	2.28763
33027	Inx7	9.03249	9.33224	9.44164	10.4367	10.6993	11.0564
33039	Obp19c	11.6489	11.448	11.1041	4.73011	2.77135	1.80611
33072	NPC1b	2.87672	2.56541	4.19321	11.691	11.0212	12.2339
33073	Ser6	8.01011	8.05902	8.4841	10.1034	10.228	10.7733
33158	Cda5	9.82657	9.97258	9.40831	5.66148	4.87122	5.51955
33183	CG11617	3.3865	3.93483	3.77777	2.36642	2.39506	2.32395
33199	Amnionless	3.76396	3.37454	5.02488	7.77813	6.51297	9.01767
33205	CG11912	4.12191	7.16105	6.59486	2.03712	2.00764	2.02677
33206	CG11911	10.5712	10.7088	10.2024	3.41707	2.30609	2.3287
33209	CG4213	7.75642	7.25437	6.28311	3.53008	3.66511	3.48411
33274	Lsp1beta	8.27083	8.46303	9.43385	5.49849	3.55352	5.13863
33290	Iris	11.1506	11.0293	11.0131	9.43763	9.5379	10.1614
33291	CG4577	10.0398	10.3603	9.89903	10.9945	11.4312	11.3665
33303	Charon	10.8527	10.5853	10.8283	12.3677	12.4123	12.3774
33312	CG42329	5.37961	7.40281	5.77167	3.27111	2.79037	2.81054
33313	CG5397	6.96295	6.95778	7.21472	4.44771	5.22115	5.58794
33330	CG31661	12.939	13.0572	13.2191	10.2397	8.59233	2.28181
33359	CG31664	2.30741	2.29942	2.32657	5.76028	4.08387	8.21981
33385	CG4259	9.80808	10.1559	9.27474	6.73193	7.34727	7.43462
33396	CG15385	5.50312	5.74451	6.75697	6.95055	6.95355	7.63823
33413	CG16995	1.92316	1.92407	1.96165	7.98262	9.78664	9.76416
33420	CG3597	10.2675	9.88631	11.1499	8.36239	8.26831	8.94135
33438	Cyp309a1	3.85131	2.9649	5.69618	7.16299	7.03552	8.3492
33446	CG15394	9.44975	9.90042	10.1192	12.1829	12.7004	12.4196
33474	daw	8.47535	8.62383	7.53089	6.2258	6.89264	5.7171
33510	CG17224	10.4209	10.2529	10.6798	13.0322	13.3045	13.1793
33511	CG17264	4.17795	4.20013	4.15487	5.11775	8.42554	7.63811
33541	CG9663	6.51215	6.16498	6.58091	7.89155	7.81383	8.59699
33545	CG8837	2.37251	2.36902	2.3772	5.33567	6.49587	6.4224
33548	CG15408	7.32551	8.08516	9.04045	9.52695	9.28121	9.87305
33553	CG15412	8.78768	8.82338	8.66719	5.08274	3.06274	3.10621
33559	CG2772	6.84957	7.0858	7.3071	2.31018	2.36696	2.11062
33585	CG15418	9.03311	8.33744	8.28163	6.1813	6.24624	5.67099
33593	CG3604	2.31301	2.29537	2.27113	4.20309	5.30876	5.48423
33615	CG15422	3.55135	3.97119	5.25182	8.32392	8.32405	9.03562
33616	CG15423	6.43028	6.14656	6.31228	10.0432	10.126	10.2547
33636	Atet	11.2204	11.4541	11.426	9.70829	10.0557	10.0876
33678	Clect27	12.5941	13.107	12.8652	11.2324	11.3334	10.9865
33707	Jon25Bii	11.1279	11.1297	11.4491	7.79676	5.77311	2.63409
33708	Jon25Bi	12.4094	12.2346	12.5752	11.3908	10.0859	8.11634
33726	vkg	12.5365	12.623	12.4918	11.4013	11.1827	11.2178
33727	Cg25C	12.5217	12.7444	12.7667	11.0503	11.3818	11.3464
33749	Cyp28d1	9.27915	9.57532	10.6497	11.0592	10.989	11.5349
33752	TpnC25D	8.29321	8.79101	7.74804	4.90743	4.93617	5.03516
33755	Cyp4ac2	5.44662	6.58012	6.31038	3.20941	3.3028	3.19862
33756	Cyp4ac3	7.29257	6.57786	5.77347	9.09325	9.89238	9.87626
33759	vri	11.0592	11.4515	10.9717	12.3522	12.628	12.5114
33763	CG14022	12.7026	13.043	13.02	11.5291	11.0277	10.8636
33764	TotM	2.25232	2.4251	8.55861	12.0159	11.5074	12.656
33765	fusl	7.88794	8.09325	8.37408	7.03341	6.64669	7.26784
33770	mid	8.15204	8.31258	7.95134	4.24874	3.7829	4.48489
33824	Gpdh	12.3118	12.5435	12.2851	10.8069	11.1841	11.1104
33824	Gpdh	12.3118	12.5435	12.2851	10.8069	11.1841	11.1104
33827	Vm26Ab	12.6214	12.9179	13.064	11.3086	8.47317	5.8146
33828	Vm26Ac	12.3535	12.2774	12.5732	10.1382	2.74942	2.67821
33829	Vm26Aa	13.2168	13.1169	13.2501	11.6802	8.81774	6.05679
33830	psd	11.9143	11.8206	12.2883	9.35869	3.86383	2.45891
33831	CG13992	8.66515	8.24945	9.13771	3.06278	2.33077	2.28713
33839	Gal	3.47335	3.29678	4.0753	2.59931	2.44792	2.42703
33840	CG9098	4.07624	3.71765	3.45373	2.37448	2.40534	2.41511
33884	CG9497	4.19823	4.0077	4.46968	2.55691	2.29732	2.58622
33885	CG9498	10.381	10.5173	10.635	11.5775	12.2265	11.6918
33893	Nepl6	2.54598	2.87242	3.8809	7.63975	6.51087	8.25294
33916	eya	9.77625	10.0965	9.82578	8.07745	8.30443	7.96793
33946	TTLL3B	10.3571	10.9428	11.3063	13.2475	13.2515	13.2919
33957	sens-2	2.9224	2.92841	2.9029	4.11042	3.85278	3.80249
33961	Nha1	9.21324	9.38402	9.1224	7.56215	6.75044	6.58173
34017	CG5177	10.545	10.6222	10.0744	7.74998	6.52264	6.84832
34023	CG5973	13.2993	13.4248	13.2234	12.253	11.978	12.0579
34041	CG18585	9.21335	9.72462	9.28596	7.65547	7.90299	7.51018
34042	CG7025	9.10957	9.55629	8.47961	2.57233	2.50859	2.28715
34049	CG13795	8.57984	8.84184	9.52408	10.346	10.412	10.2938
34051	CG13796	6.94121	7.13827	6.79157	5.02263	5.91047	5.7293
34053	CG7214	12.7936	12.9564	12.7973	9.16116	2.35504	2.39177
34055	CG7203	12.8839	12.9533	12.7956	9.66764	2.44739	2.52793
34060	Uro	10.4078	11.3238	11.8024	13.1731	13.304	13.2864
34093	Tg	5.40521	4.85986	4.39883	2.91415	3.18082	2.83001
34122	CG8360	8.99537	9.7654	9.48238	10.7856	10.6422	10.8848
34123	CG8353	7.44952	8.76905	9.8292	12.3484	12.6139	12.5627
34166	fy	7.33576	6.85072	7.16672	9.47613	9.28151	9.79992
34189	Acer	12.7898	12.8046	12.7115	11.7043	11.3474	11.3045
34206	LManVI	13.2662	13.1579	13.9072	12.379	11.8828	10.5102
34211	Tsp29Fa	12.5873	12.797	12.7107	13.7731	13.7813	13.8531
34219	CG18088	8.82007	8.90357	9.07338	3.01064	3.06602	2.57504
34221	CG13101	10.8143	10.6675	10.5892	8.94784	9.45754	8.65723
34227	CG9568	12.5802	12.5886	12.9141	13.7685	13.9285	13.9975
34237	CG32982	2.36864	2.21842	2.20979	3.49114	4.26085	4.2599
34258	Mco1	4.50463	4.45434	4.67169	2.48847	3.08135	2.57346
34259	Fbp2	8.4821	8.09154	10.5637	2.77394	1.97658	1.994
34269	CG17855	2.31676	3.27895	2.51113	5.79419	6.53944	7.26476
34271	CG13113	11.7609	11.93	11.7467	8.37916	6.0011	6.02893
34288	CG13116	6.37837	7.2297	7.0439	8.84319	9.0505	8.82664
34289	CG13117	5.98633	6.21426	6.61599	7.09239	7.80676	7.68435
34297	CG17633	12.1283	12.3458	12.2116	8.34396	7.55742	6.22525
34350	Sur	4.82969	4.89981	4.86189	2.94538	3.20506	2.96233
34379	Hand	5.83527	7.18954	6.7095	9.91366	9.84119	10.454
34381	CG13138	8.05795	7.34269	6.54816	2.96015	2.89863	2.93826
34401	CG5367	7.39013	7.59877	8.04106	4.49052	4.12138	3.79554
34409	gny	10.091	10.8162	10.6929	12.0129	12.096	12.1714
34409	gny	10.091	10.8162	10.6929	12.0129	12.096	12.1714
34436	LMan1	8.02966	8.22463	8.51505	6.9524	7.00011	6.92342
34437	LM408	11.5516	11.5624	11.8351	10.542	10.3691	10.2859
34438	RluA-1	6.13816	5.87997	6.00717	4.40407	4.18987	4.48877
34450	Lip4	7.73587	9.13937	9.59745	10.4834	10.7516	11.0123
34453	Trim9	2.10884	1.9837	2.05899	2.67764	3.06823	3.81237
34471	CG17108	13.4417	13.6079	13.7473	12.8305	12.3208	12.3643
34472	CG7300	10.5971	10.4532	10.7261	6.93224	4.81423	3.93667
34485	CG17124	9.62252	9.83191	9.67482	7.9579	7.97709	8.71691
34485	CG17124	9.62252	9.83191	9.67482	7.9579	7.97709	8.71691
34488	CG6724	11.0788	11.1826	11.4469	9.20669	9.76359	9.35533
34493	CG6508	10.0909	9.98671	10.0243	5.09538	3.4435	2.02083
34506	CG12517	8.27563	8.34614	7.83226	4.77665	4.37142	4.62376
34528	Art8	10.2943	10.3367	10.4725	8.99092	9.51643	9.41548
34537	AstC	10.3165	10.7686	10.8804	11.5937	11.9298	11.7349
34552	hgo	8.40617	7.11438	9.93483	11.5414	10.3271	11.1649
34558	Vm32E	13.1655	13.0421	13.2684	11.3236	6.08566	3.41281
34569	salm	6.27034	6.35736	5.89846	3.38804	5.08147	3.17713
34570	sala	3.27389	5.41034	3.99679	2.3219	2.29411	2.3151
34594	Pde1c	9.50759	9.54402	9.46704	10.9216	10.9128	11.1252
34604	Cry	9.07335	8.243	9.48421	11.6223	11.5804	12.3344
34607	CG16965	6.11977	6.66591	8.84228	10.6954	10.7706	11.2282
34615	Rh5	2.04991	2.07329	2.12416	2.71778	3.97895	2.87501
34652	vir-1	11.6519	12.097	12.0151	12.8107	13.4388	13.2003
34662	Oatp33Eb	7.30235	5.96342	6.18671	11.306	11.0821	11.2094
34669	nub	6.70393	7.88296	6.67055	10.8674	10.9242	11.3975
34673	pdm2	2.54966	2.47653	2.42966	6.25748	5.87673	6.8185
34728	CG5867	12.5415	12.9955	13.0715	11.8592	11.8824	11.757
34758	Vm34Ca	13.7767	13.966	13.918	12.8608	10.7687	10.053
34760	CG16956	10.497	10.6508	10.4559	4.70864	1.83713	1.84965
34791	b	9.44679	10.2749	9.67465	6.82228	7.25625	6.95173
34801	CG7953	11.19	10.3405	11.1813	13.2509	12.7719	13.3033
34802	CG7968	5.03614	7.64138	9.07342	10.8323	10.8469	10.945
34811	CG16885	9.74789	9.88451	10.1479	4.01387	2.25628	2.27477
34812	CG16884	9.98404	9.54233	9.23934	2.61803	2.48922	2.60922
34824	NimC4	7.32218	8.0856	6.68567	2.12581	2.13386	2.14827
34830	CG43333	10.9964	10.6946	10.2262	3.79154	2.37092	2.37962
34831	Dyrk2	10.5065	10.6274	10.4249	9.54246	9.33016	9.46937
34838	l(2)34Fc	11.6569	12.2467	12.1594	10.608	9.72811	9.95947
34894	yuri	9.74523	9.5549	9.62395	10.9768	11.094	11.2453
34903	esg	4.03083	3.45136	3.17173	6.47314	6.91685	8.74326
34919	CG7631	7.72887	7.77705	9.83504	6.0207	6.31621	5.78794
34920	CG18480	9.42876	9.66912	9.74374	12.1334	12.305	12.4639
34939	beat-Ib	5.81353	5.80561	5.74135	4.68074	4.58599	4.38075
34950	Ca-alpha1D	5.3602	6.38308	6.18166	4.68594	4.54954	4.26441
34978	Idgf1	11.6899	11.8495	11.7187	13.2324	13.3019	13.2919
34981	Idgf3	7.45715	7.88621	8.15626	10.4709	10.9235	10.8487
34981	Idgf3	7.45715	7.88621	8.15626	10.4709	10.9235	10.8487
35007	Mhc	14.1675	14.2466	14.2192	13.2971	12.6665	12.7612
35050	CG18563	2.33012	2.37043	2.91581	3.49089	4.36775	4.97828
35061	Dhc36C	7.32326	6.40939	6.54728	3.60122	3.65671	3.58291
35067	CG6870	11.8774	12.5865	11.8923	10.8689	11.3531	10.8877
35082	CG15152	9.33036	9.49419	9.71101	10.825	11.1703	11.1381
35085	Socs36E	9.9273	10.1401	10.4577	12.7787	13.1254	13.101
35086	CG17681	3.49918	3.56828	4.79937	5.59471	6.74596	7.09984
35097	Fas3	2.83126	3.67487	3.66052	4.64003	4.82519	4.62602
35123	CG10383	11.2852	11.0742	11.348	12.6044	12.8146	12.3802
35142	CG10600	5.42285	5.70396	5.47269	7.72563	7.12869	7.72062
35152	CG10621	11.1678	11.1264	12.8766	10.5648	8.99959	9.21659
35153	CG10623	12.7074	12.4936	12.6517	10.9298	10.6115	10.2525
35160	CG15170	3.05801	3.91921	4.26436	2.95054	2.48292	2.72211
35162	CG10650	10.9379	11.1205	11.6417	12.829	12.7885	12.7603
35188	amd	7.21899	8.03904	8.20669	4.10439	1.60936	1.61732
35229	CG13084	12.7478	12.8852	12.7965	10.7784	6.73116	1.95415
35247	CG10337	11.2046	11.4407	11.5334	12.2974	12.8005	12.502
35248	Tep4	11.832	11.8937	12.2104	12.9574	13.1832	13.1273
35252	CG13077	5.70746	5.97854	6.65169	9.59203	9.54516	9.86895
35286	sNPF	6.63935	7.14856	6.8175	8.58822	8.61411	8.7412
35331	CG2617	9.03036	9.47667	9.2603	10.6066	10.4352	10.5068
35343	vari	2.72672	3.56155	3.61797	3.79992	4.99243	4.95885
35372	CG9259	10.8039	11.1255	11.0724	8.16572	6.79298	7.53646
35409	CG17571	5.19672	4.84461	5.0038	2.77064	1.88703	1.88709
35473	TpnC41C	13.3919	13.5396	13.4996	11.3256	8.01437	8.2994
35498	TpnC4	13.994	14.2395	14.2548	12.9936	10.8947	10.4588
35521	CG7881	5.15458	5.67259	4.63192	2.63453	2.53448	2.59045
35528	dream	8.22094	8.36886	8.32435	9.96608	10.3945	10.3609
35531	CG14591	9.34099	10.3967	9.97059	8.68021	8.90032	8.63312
35543	Cyp6w1	9.02592	9.36463	9.355	10.2667	10.5964	10.8159
35545	CG11211	10.776	11.7976	11.927	10.8409	8.12871	8.99668
35575	cg3270	9.53968	9.77243	10.0679	8.30503	8.54191	8.50595
35600	Spn42Dc	5.21748	4.65094	5.59968	7.96785	8.05212	8.30791
35610	CG17002	8.63585	8.43665	8.03873	9.73217	9.67539	9.67109
35612	Tsp42Ec	9.33014	9.22464	9.45009	10.4528	10.4762	10.6919
35613	Tsp42Ed	11.6055	12.1531	12.3442	13.5224	13.7592	13.5895
35620	Tsp42Ej	10.4481	11.3468	10.7286	9.97085	9.82963	9.59122
35622	Tsp42El	10.8207	11.3446	11.4942	12.538	12.9107	12.7828
35627	pgant3	10.8094	10.58	10.9519	11.6448	11.8103	11.9198
35629	Tsp42Er	5.13117	5.46356	6.50354	10.5954	10.9963	11.1702
35634	Cyp9b1	7.7528	8.86498	9.18754	9.67665	9.51232	10.2587
35635	Cyp9b2	11.2303	11.4564	12.343	12.6108	12.9231	12.8644
35652	Dscam1	6.11623	6.29446	5.21355	7.09221	7.50833	7.73155
35669	CG11125	9.97905	9.41005	9.33778	10.6731	10.7467	10.6578
35670	fa2h	7.21832	7.78864	7.90751	11.0514	10.9451	11.2595
35672	CG11141	8.22551	7.60302	7.3085	9.55344	10.1598	9.67051
35683	cg1603	6.59653	6.55784	5.94335	7.68883	7.93714	8.08364
35707	cg2065	4.3029	4.33938	4.66611	6.20958	7.99464	7.20908
35708	cg2064	10.6305	10.9285	11.1587	12.4689	13.0884	12.7992
35715	LRR	3.54184	3.48527	3.71727	5.36034	5.29427	4.75336
35727	CG12824	3.73929	4.59501	4.21494	7.52023	7.87477	8.45128
35766	Odc1	11.5099	11.5482	11.1092	9.72889	9.4495	9.41196
35779	CG11210	8.75757	9.31293	9.00452	10.1513	10.0197	10.4236
35790	Lpin	10.9731	10.318	10.5589	11.7804	11.5906	11.6188
35825	Mal-A2	9.69837	9.42104	10.5163	11.2093	11.2641	11.1336
35826	Mal-A3	7.95597	8.00833	10.1485	7.46011	5.77213	5.40301
35834	CG12780	11.7187	12.1126	12.0829	13.259	13.479	13.2916
35835	Cyp6a14	6.36515	6.20238	6.42505	7.51636	8.2184	8.08659
35837	Cyp6a13	9.93013	10.3289	10.1732	12.0092	11.9041	12.0804
35841	CG8736	4.83346	4.61904	4.04175	2.16788	1.65409	1.67314
35846	Cirl	4.78994	4.88227	5.15621	3.11716	3.35631	3.20165
35853	Jon44E	12.2263	12.2723	12.4309	6.76619	4.16801	2.04288
35854	CG8586	6.72274	7.04285	7.68095	8.47028	7.88386	8.644
35859	PGRP-SC1b	5.1524	6.65313	3.29976	2.46057	1.76	2.45772
35862	PGRP-SC2	9.36168	10.191	11.2172	12.8328	11.9658	12.7484
35894	CG13749	1.90757	1.88725	1.92542	6.75526	7.96855	8.26899
35895	FANCI	9.72801	9.30163	9.27163	3.83855	3.58612	3.52171
35913	ana	9.25502	9.55991	9.33367	6.64812	7.66851	7.52289
35920	snoRNA:Or-CD2	10.7721	10.6958	10.7803	9.24599	9.05964	9.72905
35921	CG8777	7.67176	7.05743	7.19878	6.3311	5.84061	6.56404
35948	Cyp4p3	6.70075	6.55098	7.48909	10.5233	10.7278	10.6481
35981	Alp6	5.69422	6.08552	6.46515	3.52667	3.65317	2.85853
35996	CG12926	8.60501	9.09239	8.86703	10.545	10.7181	11.0444
36002	sqa	8.813	9.19481	8.72529	7.56554	7.87496	7.34491
36013	Lsm11	7.6738	7.60432	8.02953	6.66744	6.71973	6.66795
36029	CG1441	7.04191	6.75062	7.64481	5.86817	4.72061	6.11577
36047	Def	8.10602	8.62537	9.82778	11.965	12.6256	12.634
36139	dgo	4.73243	3.86885	3.68271	5.92764	5.28117	5.2354
36163	Spn47C	7.92042	8.03215	7.61018	9.24969	10.1803	9.84195
36171	shn	11.3305	11.319	11.1151	12.3996	12.6295	12.7259
36172	CG9084	4.34363	4.96192	5.23065	7.16376	7.67648	7.46703
36182	CG13215	3.011	4.16642	5.58112	9.56698	11.2007	9.70473
36183	Listericin	7.2291	8.77219	9.08461	11.3374	12.4169	11.8097
36186	CG34227	10.515	10.4318	10.8603	12.513	12.8491	12.3426
36193	Cpr47Ee	4.5541	5.9385	6.47733	3.50074	3.42803	3.32092
36195	TpnC47D	11.129	11.4777	11.3954	7.23771	2.90381	3.22141
36205	CG42336	3.95942	4.14408	3.95581	6.39754	7.49866	7.65635
36215	kappaTry	8.01145	8.79921	9.18467	10.5083	10.4912	10.5764
36216	zetaTry	10.6522	10.9828	10.9666	3.94785	2.50163	2.44686
36217	etaTry	8.87016	9.69459	9.98623	11.3602	11.6322	11.6943
36218	thetaTry	13.3533	13.3271	13.473	11.3565	11.0197	10.526
36223	iotaTry	6.49654	6.56303	5.99529	3.63567	3.66253	3.52877
36232	Sod3	12.071	12.0536	12.0428	10.7892	10.4451	10.2312
36266	Damm	8.42148	8.96274	10.4078	12.8701	12.9479	13.1054
36268	CG13185	11.2779	10.882	10.8098	9.7158	9.66026	9.7479
36298	skpB	4.61046	4.90288	5.5096	2.76224	2.68328	2.23469
36319	CG8858	11.4491	10.8854	11.304	9.59487	9.71839	9.22173
36321	RpS11	8.61502	8.71414	7.87257	4.53943	3.8464	3.71392
36333	CG17739	5.97499	6.19809	6.57249	8.54795	9.48205	8.76498
36345	Cpr49Ab	11.7996	11.9197	12.0674	9.99204	8.7797	9.14888
36347	CG8501	2.96913	4.09698	4.19906	5.08618	5.31297	5.66565
36351	Cpr49Ae	13.9572	14.1658	14.3616	12.3712	10.181	9.80595
36353	Cpr49Ag	3.10771	4.60518	4.37328	2.07773	1.79429	1.89413
36356	CG8834	9.85378	10.346	11.1093	11.8129	11.6878	11.6987
36395	nemy	11.5299	11.7185	11.866	10.4463	10.44	10.3435
36399	Obp49a	10.7902	11.3609	11.0737	12.1536	12.0194	12.0546
36412	Cyp9h1	5.61225	6.87883	7.46912	10.4061	10.4029	10.611
36417	Balat	2.17369	2.19289	2.15985	3.14012	3.44403	3.22496
36427	Sans	8.07162	7.24505	7.08174	9.4779	8.74254	8.0434
36429	CG44251	3.52934	3.58048	3.89372	7.78418	8.25959	8.76022
36429	CG44251	3.52934	3.58048	3.89372	7.78418	8.25959	8.76022
36430	CG13321	10.8376	11.0757	11.4083	12.8768	12.7476	12.7813
36433	CG13323	10.4082	10.7697	11.1835	11.941	12.0202	11.9513
36434	CG13324	10.4874	10.6794	11.4084	12.2036	12.1793	12.3044
36456	AQP	4.95843	6.03867	6.28164	4.73699	3.03486	3.87948
36472	CG10799	10.1703	10.2923	10.8891	11.7682	11.5357	12.2455
36473	CG42319	10.8069	11.0871	10.5593	8.27789	8.60511	8.37327
36477	CG4734	11.0066	11.1226	11.8826	12.5823	12.6465	12.5926
36481	CG10814	1.72718	1.98485	2.19894	4.88743	5.01259	7.02126
36511	CG42807	11.5866	12.4548	13.2038	14.3536	14.2997	14.336
36529	CG6329	11.4253	12.3007	11.921	10.6668	10.591	10.639
36530	CG6337	2.35113	2.38218	2.62791	6.10333	4.23876	7.65995
36548	St4	11.457	11.2116	11.5364	7.9128	2.32034	2.20412
36582	Mdr50	8.25339	8.19055	7.59381	2.19068	2.09155	2.11314
36589	Ih	6.06364	6.90914	7.58075	5.65826	5.46701	5.59994
36597	Arc2	8.90961	8.92749	8.82129	11.1927	11.4722	11.306
36620	CG12868	11.4443	11.378	11.5461	12.4155	12.8004	12.5066
36635	Dro	5.45101	3.68028	5.61438	7.99115	7.65731	7.83858
36636	AttA	8.54759	4.69679	9.70478	11.4627	11.6534	11.8014
36648	hui	5.74919	6.48004	6.31574	7.45235	7.8948	7.65169
36665	Cyp6a21	10.4215	10.9113	10.8705	8.58117	7.6205	8.13575
36686	CG8093	9.23241	8.91256	10.3306	10.716	10.6729	11.1162
36692	scb	11.0049	10.9166	11.0005	12.4027	12.5547	12.8442
36693	ItgalphaPS4	2.09574	2.11225	2.10908	3.16806	4.6505	5.83772
36712	CG8179	8.5197	9.54196	9.31172	8.07133	7.87415	7.9608
36742	CG8249	2.52697	2.58872	4.78495	5.02961	5.75673	6.13045
36744	CG12970	2.02697	2.02428	1.97605	6.79572	5.86701	7.53074
36751	CG8299	5.89754	8.0592	8.86405	5.12571	1.71965	1.89044
36753	Strn-Mlck	12.861	13.0723	12.8606	10.1857	4.86449	5.04387
36753	Strn-Mlck	12.861	13.0723	12.8606	10.1857	4.86449	5.04387
36790	Ptp52F	6.12704	6.03875	6.74521	6.9094	7.30353	7.8308
36800	Tsf3	4.35203	4.47658	4.80953	5.53289	6.34553	6.3502
36858	CG8303	11.0888	10.9136	11.394	8.43324	7.45551	7.65051
36860	CG5065	3.49153	4.36729	4.45181	5.84166	5.86473	6.07485
36883	CG5550	7.95662	8.59611	9.3767	9.84595	9.59991	10.2102
36893	CG6429	9.60071	10.2589	10.1196	11.0919	11.8469	11.4659
36911	CG6805	9.81742	10.0017	9.33533	10.7649	10.8107	11.2153
36919	fat-spondin	8.90724	9.26536	10.2925	10.8284	11.0772	11.2698
36924	CG30460	4.3158	3.83112	4.44886	4.75792	5.80691	5.64898
36934	Cda9	2.16204	2.17203	2.15163	2.99741	3.84941	3.50971
36960	mthl4	4.5066	4.24352	4.45649	5.67679	5.8996	6.68523
36960	mthl4	4.5066	4.24352	4.45649	5.67679	5.8996	6.68523
36973	CG4847	11.1968	11.248	11.6607	9.09219	7.25574	8.26722
36994	CG6484	10.1251	9.66396	10.0304	11.4927	11.5779	11.6174
36996	RhoGAP54D	4.92657	4.55475	4.92346	6.01742	5.99801	6.22746
37000	CG10936	4.29894	3.13906	4.38517	2.50962	2.45733	2.33203
37016	CG4975	5.30463	5.00682	5.23025	2.778	2.52975	2.69918
37020	PIG-A	10.2734	10.3627	10.3624	9.16755	9.00608	8.95978
37025	CG5002	7.42435	7.42179	9.11217	9.39027	9.74778	9.60444
37026	Sardh	1.92031	2.17058	4.2048	5.3879	4.39063	5.62925
37031	CG18635	2.72046	2.44313	2.99852	8.31369	8.46761	8.74979
37037	Dhit	8.61572	8.06532	8.17785	9.67632	10.0027	9.8182
37054	CG5770	3.38817	3.98755	4.40714	9.76535	9.78802	10.3551
37056	CG14495	2.25343	2.74737	2.7462	6.9153	6.98355	7.41584
37058	CG10911	11.6079	12.1888	11.8902	12.9614	12.9792	13.1099
37059	CG10912	10.155	11.1593	11.3852	13.3698	13.4513	13.4874
37081	CG10916	7.67905	7.56731	7.92257	9.50348	10.021	9.57323
37086	CR14499	11.0019	11.7712	12.1062	14.0896	14.1428	14.1771
37087	CG14500	9.72737	10.0576	10.7425	11.3359	11.0324	11.4232
37104	Idgf5	5.13199	5.01112	4.95601	6.3444	5.55613	6.77518
37129	CG43066	10.65	10.8431	10.7861	8.74446	8.5586	8.7627
37130	Pepck	10.7378	10.925	11.6974	10.4379	9.79743	9.58257
37134	GEFmeso	3.33835	2.90149	3.2921	4.93943	4.86866	4.91893
37139	CG5493	6.86686	7.56203	8.8564	9.89721	9.24426	9.57878
37149	edl	6.47682	6.55185	6.02356	7.63772	8.19763	7.89189
37170	CG15096	11.4339	11.4054	12.2005	10.2786	9.1307	9.51152
37190	tn	10.8627	10.9288	10.7646	9.67689	10.0366	9.70943
37197	CG15117	3.20017	3.20497	3.54695	7.22682	7.76049	8.34014
37221	CG11961	10.8346	10.9674	11.159	12.0318	12.1508	12.1968
37223	CG9416	6.48582	5.57586	6.05617	3.63497	3.06844	3.45868
37224	CG10062	5.07532	4.82	4.9721	3.54939	3.41269	3.65131
37254	sm	9.8688	10.0284	9.96694	8.48538	8.38019	8.00014
37271	Obp56h	2.22543	2.71896	2.90988	4.57095	5.25612	5.65011
37275	CG8654	8.29814	9.2346	9.57276	3.01021	3.13717	3.10018
37276	CG16898	10.5779	11.3304	11.8627	12.2651	12.4487	12.3543
37277	18w	11.7491	11.9063	11.813	10.1073	10.1321	10.8918
37287	CG9864	12.2491	12.3247	12.3665	11.1102	11.0615	10.8167
37293	CG8908	2.11646	2.09505	2.46031	3.05803	3.67726	3.19569
37295	CG11788	6.46959	6.75093	6.42951	5.18689	5.08011	5.52396
37297	Mpcp1	12.6967	13.0929	12.9712	10.1321	3.01783	3.14222
37384	RIC-3	11.2109	11.0989	11.0593	10.0207	9.98892	9.90106
37388	CG15653	6.30807	5.91254	5.62875	6.81323	6.87455	7.58556
37390	Cht8	4.84556	6.21641	6.20201	9.067	9.50002	9.50787
37399	CG9394	5.04743	5.24084	4.74458	2.63406	2.69913	2.53091
37419	Glycogenin	11.4852	11.6763	11.6518	10.7536	10.494	10.4571
37459	CG15673	5.54266	6.58414	6.83485	7.95353	8.43539	7.15936
37468	pirk	9.83822	10.2595	11.2229	12.4267	12.3019	11.677
37477	CG10307	6.05808	6.41485	6.10231	2.48945	2.17694	2.21798
37488	CG4363	10.2133	10.1262	10.5578	12.3383	12.4753	12.1847
37489	CG4377	10.4872	11.1019	11.2177	12.8858	12.9345	13.0263
37496	CG13488	2.2571	2.24795	2.22883	9.44438	9.6521	10.4431
37540	Alp8	11.4001	11.5063	10.6343	1.83448	2.59898	1.80611
37547	CG5819	5.72004	5.32028	5.82189	8.34316	9.1262	8.95031
37565	CG10344	8.66297	8.71234	8.206	9.74582	9.77558	10.0338
37565	CG10344	8.66297	8.71234	8.206	9.74582	9.77558	10.0338
37572	gas	2.35538	2.75692	3.05465	7.48498	7.72807	7.56529
37594	Cyp6d2	5.05797	4.92542	6.18942	10.0784	10.3504	10.6007
37597	CG13511	1.99789	1.99741	2.22629	6.46274	6.74387	7.09713
37598	CG42565	5.41718	5.37847	6.21516	9.29435	9.94434	10.6201
37600	CG30269	9.93644	10.0594	10.1291	11.7265	11.8765	12.0122
37602	ppa	4.25961	4.50562	4.13323	5.12085	5.36892	5.85863
37624	CG9825	3.38186	4.09626	3.86025	2.41346	2.35608	2.40717
37641	nahoda	11.831	11.6413	11.3765	10.0626	9.85423	10.0043
37737	Eglp2	4.41808	4.99865	4.67939	3.80672	3.37159	3.10597
37746	Pal2	6.59317	6.70193	6.72309	7.65583	8.4874	7.84236
37762	sona	11.9438	11.8375	11.6307	9.43597	7.16929	7.03478
37786	TM4SF	5.49192	6.60772	6.02911	4.21724	3.84938	3.8028
37789	CG5597	9.7016	9.75646	9.54576	10.7663	11.3753	10.6756
37792	Upf3	6.96467	6.92477	6.95301	5.60802	5.9688	6.00678
37806	Orcokinin	3.92532	5.21832	5.80984	7.80704	8.76504	7.69089
37814	Fmo-1	3.32312	3.49154	4.54912	3.08966	2.46865	2.57184
37823	Phm	9.07991	8.73279	8.99974	9.99759	10.2152	9.97532
37844	ppk29	3.99111	3.59553	4.07376	2.53438	2.30749	2.38592
37853	Mlp60A	5.29672	7.19007	6.75966	2.18841	1.94555	1.95267
37853	Mlp60A	5.29672	7.19007	6.75966	2.18841	1.94555	1.95267
37853	Mlp60A	5.29672	7.19007	6.75966	2.18841	1.94555	1.95267
37867	Dat	10.9064	11.0754	10.9426	9.802	9.71651	9.23352
37888	betaTub60D	12.1151	12.32	12.575	13.2882	13.3212	13.5456
37920	CG11413	7.95623	9.15814	9.14739	3.59588	2.83125	2.61806
37921	ITP	7.75929	9.05457	9.43797	10.1375	10.4518	10.3824
37941	Cyp9c1	2.25236	2.29479	2.67484	4.81728	5.06821	5.15214
37943	CG4781	3.23585	3.02735	3.29814	5.18222	5.38814	5.42521
37949	Mmp1	2.50043	2.67662	3.06781	4.53685	6.11834	5.98729
37949	Mmp1	2.50043	2.67662	3.06781	4.53685	6.11834	5.98729
37949	Mmp1	2.50043	2.67662	3.06781	4.53685	6.11834	5.98729
37967	key	11.3933	11.4605	11.1904	12.2835	12.3771	12.3956
37985	pain	7.72233	7.74498	7.78674	8.41143	9.25051	8.73651
37986	CG30427	4.95493	4.55954	4.58741	3.61761	3.30858	3.97746
37997	Phk-3	3.88448	4.52947	6.00496	9.52991	11.1434	10.7944
37998	CG2736	10.8378	11.13	11.552	10.3448	9.69897	10.1596
38003	Nplp1	6.79358	7.11123	7.02358	7.82584	7.99924	8.30633
38006	gol	7.33795	7.59938	6.29464	8.54833	8.96594	9.12094
38011	CG9380	4.06871	4.04441	4.36501	8.9414	9.4414	9.9362
38011	CG9380	4.06871	4.04441	4.36501	8.9414	9.4414	9.9362
38015	Lsp1gamma	6.86806	6.547	8.13325	2.63364	2.28223	2.3149
38021	p130CAS	8.78034	8.46283	8.96365	9.64144	9.89012	9.77308
38023	Vdup1	7.22355	7.46701	7.23694	5.80802	6.12607	6.04741
38036	CG13877	2.15456	2.53818	2.30717	3.51833	5.03512	4.35633
38037	pyx	4.66804	5.1674	4.81682	6.68439	7.81666	7.28032
38057	mthl10	5.60733	6.78227	6.80416	8.89536	9.61041	9.29718
38065	trh	6.9726	6.93143	6.92647	6.01403	6.03731	5.76854
38083	hiro	10.0614	9.47544	9.92512	7.90089	7.59161	7.63223
38107	CG13905	9.24291	4.60843	9.02834	12.7968	13.1804	13.0934
38122	LysX	7.68554	9.85712	10.5771	13.2995	13.4274	13.6147
38149	Ctr9	9.32493	8.391	8.71035	5.92712	5.45283	5.30144
38153	Myo61F	11.7264	11.723	11.8974	12.6832	12.8907	12.8698
38168	rho	8.17283	8.95805	8.15127	10.1745	10.5946	11.0176
38180	Cct2	3.53364	4.52505	3.72163	5.48621	6.38122	5.47232
38190	CG12105	6.99614	7.07854	6.03217	2.33821	2.06136	2.0178
38220	PIB-Wb	4.74853	4.37489	5.68562	7.58365	8.96775	8.4363
38223	Cht2	7.89954	6.51304	6.48029	5.0815	4.4075	4.68316
38238	GV1	5.0451	5.66811	5.60039	3.71569	3.56454	3.72054
38238	GV1	5.0451	5.66811	5.60039	3.71569	3.56454	3.72054
38238	GV1	5.0451	5.66811	5.60039	3.71569	3.56454	3.72054
38240	Cpr62Bb	10.9574	11.6051	11.3607	9.14518	8.68526	8.72689
38241	Cpr62Bc	6.71899	8.24986	7.36796	2.16782	2.15022	2.16014
38251	Tmhs	10.2403	10.3342	10.3154	7.15264	6.52065	5.95084
38264	cg1139	3.59653	3.8833	5.32366	5.83037	5.89081	6.40092
38273	CG15822	6.98524	7.08303	6.37087	4.95281	4.35676	5.05655
38294	yellow-g	13.4117	13.2377	12.9448	10.4753	6.52572	1.85399
38295	yellow-g2	13.3074	13.3911	13.2438	9.74737	4.65594	1.74909
38310	CG16762	4.42803	7.06778	6.99996	10.1424	10.6773	11.05
38326	Pxn	6.0539	5.82	6.42351	4.97479	4.49805	4.93472
38328	CG14949	6.6	6.76127	6.82847	8.49133	7.81558	7.13414
38330	CG1246	8.06911	8.30926	8.25346	10.0303	10.0926	9.91115
38363	CG32485	9.1616	9.0053	8.25382	10.7567	11.045	10.8951
38370	Cht7	7.3313	7.61401	6.73174	2.42478	2.34271	2.36712
38383	CG14963	4.1758	3.84363	4.51863	8.75585	8.29362	7.5421
38393	CG32277	5.1589	5.74707	6.41645	2.32289	1.98072	2.53964
38408	Drsl2	2.14269	2.12676	3.89703	7.56481	6.1896	7.90016
38409	Drsl5	9.65743	10.0688	9.2984	7.52007	6.91271	7.24034
38422	CG12012	8.50147	8.77868	8.63515	9.80451	10.6131	10.261
38484	Gad1	11.8437	12.2122	12.1097	10.8982	10.7681	10.6593
38486	CG14990	8.61028	7.91242	7.76383	2.06894	3.02025	2.25183
38493	Rop	8.09573	7.3049	7.82148	8.59754	9.01058	9.08123
38495	Akh	3.99253	4.45972	4.58926	7.28674	8.31438	7.47891
38513	ImpL2	9.55753	9.89347	9.66593	11.0416	11.1511	11.3515
38540	slow	4.24398	4.30592	3.76619	2.26602	2.25119	2.26509
38543	DOR	8.18308	9.69772	8.76907	6.97399	6.7144	6.00894
38546	CG15021	6.88412	7.15603	7.37034	5.00407	5.10405	4.52937
38578	RhoGEF64C	2.90759	3.16154	3.3903	2.10832	2.09136	2.11206
38583	CG13707	2.1941	2.14447	2.53677	3.57733	3.15812	3.36467
38588	CG13704	8.51087	9.25672	9.44541	11.7232	11.9231	11.9045
38623	CG13285	2.59649	2.7425	2.72707	10.0912	10.0931	10.2767
38632	Alp10	11.3522	11.4755	10.9014	9.34847	9.40939	7.46601
38633	Alp9	10.8752	11.1449	10.5309	7.50564	7.91952	5.37011
38636	mthl2	8.97497	9.45787	9.15975	7.95801	7.6161	7.91561
38657	vn	4.54523	4.46953	3.14719	5.23609	5.49073	5.88309
38667	CG32407	10.9612	11.4928	11.774	8.67337	8.74643	8.59775
38682	Jon65Aiv	13.2289	13.0694	13.1166	11.9782	11.5368	11.4124
38684	Jon65Aii	10.9431	10.9577	11.0111	2.96421	2.32574	2.02051
38685	Jon65Ai	9.49574	9.11515	9.26948	3.34213	2.4026	1.77179
38688	CG10472	12.5891	12.4904	12.5897	11.077	11.0787	10.7388
38710	Acp65Aa	13.0274	13.2095	13.6542	8.39926	2.0426	2.06901
38724	CG13299	12.7653	12.6903	12.3937	10.0268	8.90733	7.12037
38728	CG10163	12.066	12.1012	11.8985	8.91555	2.68237	2.30599
38738	ndl	12.5399	12.0155	12.531	8.83331	5.53173	4.00509
38782	Acbp6	3.52885	6.91181	7.59109	12.5658	12.7856	12.8555
38783	Hsc70-4	6.98479	8.27508	9.59853	11.2301	11.1832	11.5101
38784	Dbi	10.6186	10.7057	11.4858	12.0651	12.0699	12.2319
38814	CG14834	12.5228	12.0601	11.8475	8.76665	3.32581	2.40474
38818	pst	13.0487	13.1165	12.8907	13.9915	14.1179	14.1185
38828	CG8562	9.5338	9.97835	10.2746	3.03213	3.71306	2.26384
38830	CG8560	11.4108	10.7742	10.6001	1.87537	1.87569	1.89084
38842	CG8539	10.9359	10.905	11.5571	9.52634	9.56591	9.72891
38858	PGRP-SD	2.41732	2.2167	6.7678	9.89248	9.92508	10.1179
38870	CG7409	13.328	13.6903	13.4708	12.0922	10.657	10.9637
38884	exex	8.86676	9.16687	8.52538	10.7564	10.6873	11.8329
38973	se	2.90762	3.91264	4.80984	2.23064	2.26268	2.27289
38981	CG43078	11.694	11.925	11.9042	10.0585	9.82498	9.93174
38990	Cpr66D	6.017	6.95328	7.20276	7.61468	8.27527	7.67647
38995	h	11.4557	11.3509	11.0543	12.3085	12.6936	12.0195
39002	Prm	12.2196	12.4314	12.2282	10.6884	10.5299	10.2638
39002	Prm	12.2196	12.4314	12.2282	10.6884	10.5299	10.2638
39004	Fhos	12.9629	13.1285	13.1121	11.738	11.2708	11.3878
39008	CG13311	3.07286	4.18612	8.08747	10.3759	10.5741	10.8076
39049	bol	4.54263	5.1824	4.66741	3.69418	3.77142	3.89438
39062	PGRP-LA	7.25239	7.85562	7.98875	9.82257	10.5653	10.5794
39063	PGRP-LC	3.48914	3.12	3.50461	5.72366	5.4535	5.82108
39064	PGRP-LF	5.79864	5.61594	6.45957	8.90038	9.31437	9.2636
39065	UGP	3.83382	3.90185	4.37288	6.40609	6.64376	6.64914
39074	CG4461	9.75667	9.93491	9.87766	6.76068	7.07325	6.27912
39092	CG33926	6.26342	7.66824	6.22848	11.7086	11.6495	12.04
39093	CG3529	9.59762	9.68343	9.46801	10.3074	10.792	10.8134
39098	CG3434	10.565	10.5639	10.5882	9.10735	9.08629	8.94919
39125	CG18180	12.0424	11.8939	12.0561	9.12335	8.00372	4.22377
39143	ATPsyn-b	13.2444	13.4163	13.4408	12.4254	12.1169	12.0537
39150	Ilp2	2.12982	2.12429	2.46774	2.62295	4.09628	3.60744
39151	Ilp3	1.99979	2.04917	1.97134	5.78469	6.24742	6.54436
39166	Hez	2.16211	2.11633	2.29483	3.14714	3.67449	3.26526
39166	Hez	2.16211	2.11633	2.29483	3.14714	3.67449	3.26526
39178	CG32053	2.55701	2.55991	2.48547	3.78833	5.1035	4.92803
39232	CG7888	12.2007	12.5018	12.5402	10.4985	10.2021	10.0717
39234	Blos2	8.93821	8.78217	9.27925	7.63554	7.63664	7.88232
39253	mRpL2	9.48566	9.89686	10.1614	8.89449	8.64038	8.12988
39263	CG7607	3.76596	4.72801	4.21346	5.2897	5.75717	5.85011
39276	CG7560	4.24831	4.73955	5.9905	7.72434	6.89433	8.38444
39293	MOB2	8.38681	8.57599	8.68313	9.9943	10.0936	10.5413
39319	CG11658	7.39274	9.08134	8.63646	10.1684	10.7208	10.1273
39328	CG14131	6.42273	5.11817	5.67756	6.89035	7.12256	7.88273
39392	Est-6	12.5918	12.9466	13.2702	11.8081	11.6382	11.7851
39422	CG10660	1.89645	1.85634	2.34364	3.61713	3.27274	3.6974
39441	mirr	5.33712	5.30644	4.76627	3.30615	3.51426	3.47968
39448	Vps13D	10.2928	9.86067	10.0438	8.77145	9.2471	9.03431
39462	CG10943	11.8098	12.2405	12.1018	13.6499	13.5769	13.8467
39466	CG12520	2.89486	3.09295	3.09899	6.2416	6.51191	7.13169
39512	CG14109	6.89977	6.91635	6.59379	8.30793	8.83121	7.95006
39515	CG10116	10.507	11.0635	10.7849	12.2364	12.3655	12.2871
39531	CG13737	6.50054	7.04851	7.49007	1.91267	1.94665	1.96571
39531	CG13737	6.50054	7.04851	7.49007	1.91267	1.94665	1.96571
39540	ssp2	2.41722	4.03172	3.69363	6.48518	5.46807	6.02298
39542	Hsc70-1	12.5091	12.952	12.9445	9.90639	7.67907	7.94683
39542	Hsc70-1	12.5091	12.952	12.9445	9.90639	7.67907	7.94683
39552	ptip	4.97485	5.49887	6.11052	7.65854	7.2225	7.59521
39558	blue	7.16125	6.97019	6.72672	5.58809	5.96812	5.69793
39566	Fbp1	7.31436	7.46074	9.13283	2.63918	2.22204	2.23369
39577	CG13482	9.36521	9.53049	9.63678	11.5528	11.9324	11.7415
39583	bbg	10.3908	10.6271	10.8525	12.1482	12.3528	12.5081
39619	Tom	4.08864	3.80621	3.12204	2.21611	2.16875	2.17674
39626	Zip71B	2.39407	2.62491	3.27835	3.92789	3.6914	4.24107
39634	CG12310	2.2076	2.15936	2.16286	5.91104	7.7211	9.15337
39643	sstn	7.04506	6.78586	6.813	8.33987	8.41958	8.42566
39647	Cep135	9.64634	8.91102	8.72855	8.24245	7.63182	8.29385
39653	FucTA	4.44738	4.67756	4.00225	7.02612	7.37884	8.31804
39677	mex1	10.0535	10.9686	11.2119	12.499	12.778	12.8058
39678	yellow-k	8.27381	8.99761	9.27357	4.00769	2.67749	2.2766
39681	obst-H	1.90046	1.91324	1.91925	4.8669	6.20298	6.1216
39694	CG7650	3.18326	3.1364	2.94063	3.69557	4.53509	5.14921
39720	fwe	1.51517	1.95406	2.518	3.71641	3.89925	3.28142
39721	CkIIalpha-i1	7.53634	7.54135	7.4489	9.40507	9.44759	9.26989
39739	CG17026	6.70148	7.38717	7.92802	4.11132	4.55093	4.345
39752	CG5895	3.64957	3.49541	3.91406	4.7401	5.24694	5.93623
39753	th	10.5375	10.7786	10.6857	12.1333	12.0404	12.1276
39778	l(3)72Dr	5.79179	6.40548	6.3199	2.72064	2.36237	2.62767
39783	CG4950	5.3515	5.22124	4.67051	3.50176	3.12836	3.8336
39793	CG4962	7.25235	7.76775	7.1573	3.19398	2.4477	2.9963
39812	Pdh	11.6823	11.8909	11.7153	10.5686	9.41853	10.026
39816	Cpr72Ec	8.275	9.41132	9.47898	6.94454	3.56669	5.03443
39817	CG4842	7.93283	6.90179	7.80743	4.83172	4.3423	4.33352
39824	Grp	2.30024	2.22929	2.22032	3.74918	7.16841	6.20662
39841	Mipp1	12.199	11.865	12.0052	9.80495	10.2729	10.3625
39843	nxf2	12.3507	12.2587	12.1211	11.2432	10.7831	10.8192
39868	CG13026	9.83879	10.5467	10.2114	4.32485	2.4053	2.39987
39870	PGRP-SB1	11.9058	9.9342	12.8115	14.3749	14.1584	14.4971
39887	Rh4	10.2194	10.4192	10.0828	11.2845	11.8881	11.5391
39936	Cad74A	11.4506	11.3862	11.3396	6.35058	2.71079	2.61295
39959	Jon74E	12.8895	12.4378	12.0458	7.93098	6.33114	4.26779
39960	CG7542	11.0502	11.4311	11.3489	8.93188	7.38382	3.23026
39998	CG5290	7.56212	7.27104	7.71823	5.89161	6.37462	5.90696
40034	GNBP1	6.79021	6.74471	7.30598	7.79558	7.86395	8.81981
40067	CG6839	6.30498	8.91882	7.46141	1.94404	2.01289	2.00561
40069	CG3819	10.0531	11.299	11.0533	5.80496	6.77714	2.54558
40070	CG6836	10.5919	10.8304	11.1495	9.5318	10.02	9.70397
40075	SmydA-2	2.99749	4.60634	5.5454	2.16698	2.21753	2.23019
40117	CG9449	6.15479	6.21923	5.25815	4.71291	4.24437	4.26082
40117	CG9449	6.15479	6.21923	5.25815	4.71291	4.24437	4.26082
40147	CG8765	10.4079	10.2231	10.2607	9.2501	9.26266	9.34574
40150	serp	7.76422	8.67053	7.79973	4.03624	4.48152	3.32509
40153	CG42637	2.37993	2.36812	2.35866	3.87932	3.76605	4.90448
40157	Ir76a	9.44265	9.53251	8.62143	10.2904	10.5404	10.4416
40161	Cyp305a1	10.8227	11.3033	11.237	9.89505	9.5662	9.60733
40185	fln	13.2577	13.7608	13.7149	11.3773	4.81602	5.27739
40196	CG14186	8.22581	8.37579	7.72903	9.05548	9.49908	10.7639
40199	CG14187	10.4752	10.5464	10.5247	4.29535	2.12547	2.06463
40205	CG42674	3.72511	3.91085	3.37916	4.91273	5.43688	5.60252
40207	Ssk	11.2094	11.6361	12.1168	13.6147	13.7298	13.7255
40210	CG7298	2.86067	3.67994	6.34976	10.0716	10.3608	10.0287
40214	CG6933	2.58658	2.5716	2.52858	3.31267	4.30382	3.39609
40234	Spn77Ba	6.59777	6.16034	6.85095	7.416	7.96871	7.865
40254	CG13248	3.03821	3.34016	3.36399	4.13196	4.86833	5.05356
40264	CG5910	10.1988	10.4236	10.3714	12.2023	12.4178	12.5448
40267	mag	12.3075	12.5047	12.5081	8.51166	4.10897	5.73594
40272	ND-39	12.0393	12.2645	12.2084	10.985	10.6461	10.4223
40326	CG10581	6.14458	5.54858	6.02663	4.12176	5.18845	4.20321
40330	ko	5.01041	5.24294	4.12086	3.96191	3.58897	3.81036
40333	Ac78C	6.95259	8.31412	7.64894	8.87389	9.2152	9.31186
40336	park	4.08176	3.71764	3.75857	1.97924	1.99328	1.8578
40350	CG12974	8.80378	9.05319	9.57483	12.5748	12.6199	12.7228
40368	rgn	8.95677	8.8811	9.30388	9.96237	10.5165	10.4042
40381	Est-Q	8.00004	8.40254	9.08384	10.8993	11.1381	11.343
40383	M6	2.42771	2.46825	2.44452	3.30386	3.56499	3.58444
40437	SLC22A	2.30993	2.65039	2.43424	5.66242	5.72076	7.54788
40442	CS-2	6.21327	6.74621	6.00707	8.90547	9.51888	9.36982
40444	Act79B	13.1917	13.3809	13.4129	11.211	8.58197	9.02342
40450	CG7130	5.37175	4.87636	5.0697	7.53684	7.95351	7.12152
40457	Ddx1	11.8921	11.917	12.0986	11.0225	11.0165	10.7804
40471	CG11426	4.82289	4.73757	5.34886	6.39609	7.02299	6.69529
40472	CG11425	2.8517	3.91477	8.54791	10.2447	11.3409	9.25485
40479	CG14457	2.45819	2.88146	2.8527	4.40944	5.24601	5.22585
40479	CG14457	2.45819	2.88146	2.8527	4.40944	5.24601	5.22585
40515	NRM	7.60952	8.79914	8.509	4.88582	4.10182	4.70542
40521	nAChRalpha4	9.14623	8.92688	8.17964	9.82474	9.92508	10.2962
40532	CG14642	5.31986	5.22772	4.56521	6.16631	6.21978	7.12596
40540	Nepl11	4.45237	3.84838	4.50393	6.62662	6.2836	7.44066
40578	slx1	5.70286	5.34019	5.60368	6.78469	6.25145	6.71062
40588	Nep2	10.7174	10.8813	10.7472	9.30101	9.11814	8.75748
40611	CG14661	12.9681	13.2705	13.3031	11.5383	9.91463	10.3055
40615	plh	11.099	11.9212	11.3413	9.5266	8.21741	8.76981
40632	Tim17a2	6.38447	7.50534	7.59476	8.97289	8.39846	8.7266
40672	CG12746	5.76435	6.6493	6.85888	7.38584	7.72469	7.65102
40677	rev7	5.12758	5.18317	5.13179	6.03856	6.56187	6.51636
40704	plx	10.9659	11.2799	10.8765	9.94061	9.7045	9.94074
40733	cg2017	10.2062	10.2103	10.2042	8.87914	9.19465	9.10212
40737	Obp83a	7.76345	8.67323	8.16206	7.22795	6.95024	7.01244
40745	Gasp	9.99521	10.8432	10.7958	8.51053	9.15084	8.11561
40751	CG1077	12.3291	12.2562	12.1695	9.43426	2.73921	1.9444
40780	CG17919	8.61784	8.57343	8.63212	6.96424	6.83302	7.03335
40830	bcd	2.39565	3.40896	3.44008	4.81997	4.14287	4.26786
40831	Ama	4.67595	4.07046	4.25241	2.29535	2.42065	2.40138
40849	Mlp84B	11.7111	12.0796	12.0145	10.6145	10.4978	10.258
40858	gfzf	3.5914	2.92606	3.36416	4.32825	4.34296	4.81107
40866	CG14606	4.24887	4.65718	5.53693	5.5363	7.01284	6.33382
40908	alpha-Est2	7.81995	7.998	7.92378	5.19978	5.40646	5.42954
40918	Sp7	10.4488	10.7746	10.7379	11.8169	12.033	11.8188
40920	CG10086	9.12355	9.03989	9.36043	10.8088	10.9397	11.2144
40921	cg2641	6.49277	6.45572	6.68241	7.33958	7.7815	7.63925
40922	CG3014	4.61511	5.30577	3.87135	3.37626	3.65136	2.95852
40942	Os-C	7.03899	7.59996	6.45518	5.70162	4.92457	5.59361
40957	CG7900	10.1496	10.4768	10.7607	11.6506	11.5135	12
40976	CG11671	2.89532	2.91991	3.13835	11.0085	11.5274	11.2327
40977	CG11672	7.67033	7.43628	7.87127	8.74645	9.63188	9.32432
40978	CG31463	7.65114	8.0689	8.88731	5.44232	5.29807	4.69733
41038	nom	9.21781	9.14663	8.82379	10.6207	10.5663	10.5003
41111	CG16749	10.801	10.6719	10.9077	8.11717	7.86258	7.84317
41116	CG18473	5.13768	5.19412	7.02729	9.23992	8.2771	9.23251
41158	Kap-alpha3	7.75677	6.93776	7.84619	6.60941	6.04672	5.98921
41168	Scm	10.0263	8.52236	10.2847	10.8795	11.7891	12.5481
41198	Whamy	3.41373	3.39084	3.42907	5.18417	5.50406	5.67529
41206	CG8516	4.77202	5.3975	5.4064	7.51078	7.06717	7.73195
41214	CG9458	9.85165	10.1816	9.43506	8.11797	8.93568	8.99894
41225	Mical	6.83918	6.77357	6.98939	5.59195	5.67489	5.33203
41232	Npc2d	8.59016	9.28815	9.35156	2.91981	2.17703	2.1847
41253	CG3999	2.13742	2.03832	4.11627	5.41452	4.12061	5.1801
41270	Rrp46	8.2971	7.78854	7.75226	6.98106	6.69233	6.87609
41272	Cyp12e1	3.10459	3.87663	3.92852	5.46544	5.7469	6.01629
41279	pug	9.80733	9.69452	11.027	11.5784	11.0593	11.9697
41297	CG14687	11.6509	12.0941	11.6549	10.3558	10.5942	10.6354
41317	CG14696	2.33892	2.27967	2.3341	8.04462	8.33787	8.58878
41318	Adk3	8.09405	8.36613	9.26748	7.47301	7.50575	7.72005
41333	Ugt35b	11.7494	12.2416	12.2152	10.9294	11.0331	10.8679
41337	CG18577	4.21139	4.51699	4.55814	5.48816	5.78995	5.72096
41340	SdhC	11.4157	11.5408	11.3288	10.5566	10.2508	10.365
41359	CG17734	9.38696	10.2591	10.0475	8.57237	8.42904	8.29808
41379	PGRP-LB	6.19896	6.1043	7.60295	9.5267	9.78927	10.1069
41396	CG6813	2.61582	2.61682	2.37797	3.8142	3.60929	3.35592
41409	CG6834	8.02425	8.39829	7.93638	5.13904	4.84519	5.15782
41410	CG6908	11.2804	11.2728	11.8546	10.1455	10.3342	9.98218
41428	ClC-a	11.2445	10.9329	10.976	9.82441	9.77973	9.91361
41434	CG6959	8.92924	9.38656	9.0442	7.6946	8.26861	7.85999
41452	CG18547	8.61111	9.35984	10.4762	11.116	10.8637	11.0463
41474	Cpn	9.09997	9.47624	9.25024	7.99923	8.61868	8.20354
41477	CG4830	8.78449	8.5691	7.31282	2.36363	2.44175	2.45487
41493	CG4066	10.9196	11.5913	11.4689	7.43016	3.21608	2.68328
41502	GstD9	10.7998	11.2919	11.5098	12.1384	12.5168	12.2352
41558	Dtg	2.61731	2.57695	2.33805	4.71118	4.84679	5.33413
41559	CG6225	5.06032	5.02726	4.77977	3.26063	3.32909	3.26085
41561	Gnmt	6.5291	5.94895	10.0175	12.0287	12.5532	12.0453
41568	NijC	4.28051	4.84248	5.00767	3.24228	3.43315	2.90355
41570	CG12279	7.26993	6.54693	6.89443	4.86351	5.05253	4.57287
41571	mus308	6.46845	5.41709	5.921	4.06747	3.75599	3.66228
41579	CG10126	11.1238	11.6086	11.3902	12.9433	13.3478	13.1857
41586	Cyp304a1	2.30619	2.29337	2.39571	7.99761	8.04233	8.19921
41589	CG7381	5.506	4.78524	6.11115	11.6064	10.9971	11.8323
41595	yellow-f	2.61957	2.26788	3.35378	5.48835	5.47115	5.71611
41612	sim	11.197	11.1682	10.8675	8.78329	8.35978	8.27815
41623	CG8483	4.16435	3.76445	4.09098	2.26767	2.58742	2.01795
41625	Ace	6.875	7.3615	7.08768	8.28854	8.63081	8.68081
41629	CG8630	7.07216	7.64192	8.68032	6.27909	6.28128	6.06149
41634	CG8773	11.2449	11.0581	11.3021	8.27651	7.19771	6.29721
41635	CG8774	9.19818	9.67956	9.98799	6.74789	6.65639	5.08439
41647	CG9799	9.74447	9.54773	9.5769	7.94456	8.34106	8.53592
41679	Adgf-D	7.54966	7.06313	6.55597	9.58543	8.90832	9.89133
41688	CG9297	13.1601	13.3055	12.9682	11.6416	10.3437	10.5454
41690	CG9286	10.5456	10.8907	10.9048	9.68356	9.67364	9.79271
41711	CCHa1	2.19168	2.18755	2.16879	4.53969	6.92757	7.27433
41727	CG9649	8.54059	8.70998	8.80621	9.63307	9.67627	9.99996
41747	NK7.1	2.75901	2.44325	2.40047	4.1457	4.91912	4.78625
41759	Cyp313a1	6.42377	7.85979	6.89964	3.1917	2.53894	3.28628
41766	CG8066	9.47008	9.24869	9.47324	11.3639	11.7406	11.7058
41777	CG3505	4.81838	5.34899	6.09657	9.98176	10.7578	10.3479
41820	CG6912	10.0736	9.85767	9.96443	11.6933	11.9298	11.9351
41822	CG3987	10.0048	10.6511	11.2126	13.0068	13.1969	13.1686
41824	Mf	12.9146	13.0221	12.9545	11.7785	11.6102	11.6355
41829	Spn88Eb	7.57468	8.15417	10.7477	13.3415	13.2518	13.4998
41852	Tm1	13.2089	13.3274	13.12	11.8601	11.3215	11.4945
41853	Tm2	13.1291	13.2397	13.1767	11.6323	11.2341	11.0811
41885	Act88F	13.5221	13.7619	13.6448	11.7069	8.18957	7.94311
41887	AdamTS-A	10.6731	10.446	10.4483	9.14594	9.51161	8.97262
41889	Rh6	6.98875	7.99029	7.85918	8.42699	9.14735	8.65267
41893	CG44014	3.06598	3.18369	3.4016	12.0633	12.2735	12.3853
41893	CG44014	3.06598	3.18369	3.4016	12.0633	12.2735	12.3853
41893	CG44014	3.06598	3.18369	3.4016	12.0633	12.2735	12.3853
41894	AOX1	9.75884	10.0768	10.6676	11.0858	11.3751	11.2941
41900	CG5399	13.1391	13.3273	13.2379	14.3235	14.4337	14.3766
41921	cv-d	7.45504	7.97764	8.55105	9.41967	9.49167	10.1409
41938	Sap47	8.98832	10.0791	9.78529	7.9523	8.41252	8.41359
41944	srp	11.926	11.8478	11.5301	10.1112	9.63876	9.45704
41945	GATAe	6.92862	6.26704	6.96344	7.70808	8.14094	7.81257
41949	CG10407	13.5013	13.636	13.5414	12.082	9.53226	10.0895
41962	CG6006	2.99676	3.46591	3.35196	3.86242	5.17	5.24791
41975	Zip89B	2.60936	2.2641	3.12983	3.53403	4.44409	3.74708
41977	CG6901	3.83057	3.94319	4.55006	2.80777	2.80322	3.11127
41979	CG17930	5.87458	6.12563	6.61406	8.78521	8.4687	9.91862
41982	CG14879	10.5931	10.7519	10.3423	11.6486	11.6324	11.8578
42008	decay	8.89465	8.84628	9.45722	11.7579	11.8309	11.8552
42017	CG10345	7.16001	6.84361	6.72155	5.43928	5.17095	6.05827
42018	NPF	3.79839	4.26201	4.12638	4.71538	5.35275	5.56846
42022	CG17560	11.9762	11.8551	11.9346	12.9805	12.9442	13.1332
42030	CG14907	6.69087	5.53906	6.16593	7.85297	8.33905	8.45976
42030	CG14907	6.69087	5.53906	6.16593	7.85297	8.33905	8.45976
42050	CG8907	9.79451	10.0233	9.83835	12.2096	12.3022	12.4012
42054	CG4009	13.3644	13.3779	13.2307	10.9885	6.29407	2.37104
42068	CG31265	6.86495	7.28026	8.34088	3.52061	3.68311	3.19302
42069	CG17475	7.43308	8.13957	7.35206	4.28138	3.35624	3.1042
42071	CG31266	3.54791	3.90568	4.85931	1.94554	1.97918	1.99582
42122	AttD	2.17113	2.12597	2.32712	11.0469	11.4215	11.2685
42125	CG7523	11.0165	11.0781	11.1744	12.0527	12.2501	12.1514
42128	CG7655	6.75636	7.20792	7.23467	7.78801	8.18787	8.23834
42188	CG18598	5.62782	5.83774	5.71374	4.3568	4.56882	3.79975
42196	CG8064	10.1488	9.41486	9.40838	8.45132	8.59997	8.56773
42211	CG7675	11.5289	11.8272	12.2702	10.4728	10.6216	9.65232
42214	Vha100-4	7.21941	6.65196	6.69701	4.83329	4.73033	4.72131
42234	CG7695	6.90478	7.55536	7.84034	8.24148	8.83269	8.62395
42242	CG7702	7.23829	6.41227	8.17633	10.439	10.3592	10.9516
42261	Rh2	8.78718	9.03097	8.39674	9.63018	10.0439	9.98306
42292	CG6040	5.48767	5.19787	5.7841	2.84125	3.59368	2.88539
42293	Cyp12a5	4.58257	4.85713	5.10153	5.79023	6.52069	5.70138
42313	Dl	10.5439	10.626	10.7286	9.50889	8.95403	9.74282
42338	CG16727	2.11713	2.22879	3.30524	5.37317	4.02582	5.40874
42348	Naam	8.04146	8.10067	8.41709	9.4381	10.0361	9.99289
42351	CG6300	7.45117	7.36078	7.58351	5.93741	5.8839	5.906
42354	CG11407	10.7027	10.5064	10.7766	7.99672	6.80968	7.13126
42355	CG11453	2.12842	2.08658	2.09294	2.97129	3.30512	3.31277
42356	bnl	2.61033	2.67485	3.00616	4.03933	5.21022	4.11945
42376	CG4462	5.92096	6.23771	6.53672	3.7147	3.69632	3.61783
42398	Rh3	5.56074	5.71155	5.15493	6.30056	6.93131	6.81247
42400	CG5023	12.2249	12.239	12.4255	11.133	10.7769	10.5041
42416	MtnC	11.1529	11.1573	11.2932	8.4372	6.77993	7.90072
42424	MtnB	11.8815	11.7095	12.4694	9.33792	5.19245	5.33924
42450	Cpr92F	9.10062	9.25291	9.783	4.15532	2.32692	2.36241
42451	cg4000	11.3895	11.4052	11.3948	7.68646	3.92891	3.08864
42478	hdly	8.22799	8.29936	8.55196	9.43709	9.80463	10.2309
42478	hdly	8.22799	8.29936	8.55196	9.43709	9.80463	10.2309
42482	Alp5	4.30194	4.10497	6.34071	2.0873	2.08596	2.06387
42488	CG7079	9.18678	10.0954	9.91065	8.74972	8.64187	8.41607
42512	cDIP	4.02802	3.73091	4.87047	10.2092	9.81312	10.7155
42514	Snmp1	5.38875	5.21963	4.96854	9.74422	10.8067	9.83402
42518	Oga	9.76805	9.64729	9.70435	8.61522	8.81963	8.49123
42528	cg3301	5.82883	5.7882	6.72861	4.43868	3.64253	4.21128
42531	CG16791	5.37514	5.00044	5.21687	6.62365	6.88068	7.15546
42554	CG31176	4.98701	5.02101	5.59688	6.81573	6.69951	6.30189
42556	CG5849	2.39281	2.6424	2.84441	4.81515	5.30729	7.25864
42557	CG31233	11.9705	11.9164	12.4103	9.19245	8.11973	8.08266
42558	CG42335	2.86187	2.58553	3.0781	9.87226	10.0259	10.4979
42596	how	4.44636	4.16379	4.81158	6.27399	5.60456	6.31363
42598	CG5778	13.1167	13.0344	13.2369	12.348	11.7825	11.8307
42606	CG7084	5.46937	5.74061	5.42687	3.63451	3.42765	3.42137
42614	rdhB	3.33936	7.0132	6.72569	2.91858	1.87606	2.04687
42628	CG13856	4.27277	4.20834	4.67921	3.20988	3.28019	2.61791
42638	CG34376	2.99863	3.03896	3.78761	5.10517	4.70329	4.62996
42653	CG5346	5.96499	6.23027	6.41125	7.46525	7.72379	7.40078
42654	CG33093	3.80012	4.87484	3.52381	2.50859	2.46644	2.48988
42655	CG5326	11.5599	11.7988	11.855	9.63134	9.36987	9.92957
42682	Cyp6d4	6.8507	6.4908	7.54338	8.15182	9.07158	8.74407
42684	CG6972	8.05478	7.72478	8.22825	9.22264	10.0113	9.32131
42691	CG45049	5.03075	6.03651	5.78496	7.29263	7.33585	7.55174
42701	Nepl15	8.65117	9.47132	10.5739	11.5105	11.5902	11.8173
42708	CG6660	10.0554	10.2198	10.2206	8.45094	9.05817	8.17341
42723	CG17119	10.5399	10.5216	10.6594	8.69888	9.32141	8.66841
42730	CG17109	7.49032	7.59203	7.93025	9.86294	10.0944	10.7139
42731	CG6733	5.10534	5.90253	6.37327	3.42417	2.40886	2.61258
42737	hh	2.54836	2.61887	2.60565	4.26274	5.74052	5.13424
42770	Irk2	9.07576	9.13005	9.09877	10.0223	10.1683	10.265
42775	CG16732	2.459	2.48754	2.66549	3.79076	5.29727	3.92487
42787	GILT3	11.3144	11.0923	10.997	9.8782	9.01729	9.70387
42796	Gba1a	3.23147	3.90756	7.34499	12.9327	12.5756	12.9506
42810	Lsd-1	11.9376	12.4045	12.5225	11.0199	10.7893	11.0244
42819	eIF4G2	5.47779	7.30593	6.9649	8.65987	8.43204	8.89287
42864	Npc2f	10.4739	10.4304	10.5898	9.50186	8.22635	9.43598
42879	CG17786	6.93053	7.65727	7.67992	5.11306	5.22977	5.95349
42901	CG6432	6.12966	6.33294	6.4431	4.95334	5.13442	5.57256
42924	CG13618	6.85024	6.9102	6.74622	7.71472	7.50646	8.48834
42925	CG6607	8.35376	8.13122	7.93041	6.53256	5.90269	6.42579
42929	Esyt2	9.56066	10.0978	10.0269	11.2025	11.6341	11.3437
42935	puf	7.06927	7.51639	7.36881	5.8301	5.83665	5.51935
42940	slo	3.99542	4.61356	4.68374	3.06796	2.68304	2.92677
42944	tok	10.0914	10.1444	10.5686	11.2907	11.3383	11.5867
42945	tld	1.88951	1.89489	1.88707	4.03787	2.82138	4.69527
42947	AstA	6.49153	7.8557	8.29857	11.0123	11.4862	11.5277
42968	CG7016	3.90343	3.97606	4.86569	6.44522	7.22608	7.60558
42969	CG13641	8.2878	9.12834	10.6671	12.0883	12.9173	12.6496
42976	CG11069	4.55556	3.67393	3.98862	2.53557	2.43115	2.33264
43014	Nepl16	4.97802	6.03429	6.07237	6.59115	7.07696	7.22022
43030	CG31103	6.61812	7.81059	7.42339	6.19799	6.0815	6.3311
43036	to	9.43944	9.7945	9.36942	10.1428	10.8926	10.6935
43047	CR13656	5.17969	6.00855	5.85369	3.61978	2.97639	2.49318
43050	CG11878	10.8695	10.9839	11.1467	12.0909	12.1474	12.1626
43051	CG10513	12.2763	12.7566	12.2671	7.34203	6.95548	7.73124
43052	CG10514	10.7265	10.9691	11.1596	2.83207	2.5511	2.63809
43053	CG11892	11.3082	11.7356	11.8924	4.43948	2.06739	2.35821
43056	CG11893	8.62819	9.60834	10.6616	11.5499	12.125	11.8443
43059	CG13659	3.22885	2.98952	3.54666	4.24986	5.25583	4.83171
43060	CG31370	2.48411	3.25893	3.13176	5.79508	5.97176	6.38663
43062	CG31087	8.33826	9.37036	10.1328	11.5799	11.8738	11.7543
43063	CG10559	1.99966	2.16628	2.27941	6.59633	8.43413	7.14662
43064	CG10553	10.9856	11.3843	11.1708	9.2342	8.48479	8.16719
43065	CG10560	11.2113	11.5118	11.5471	9.06728	7.84653	7.84144
43066	CG10562	9.60895	10.1842	10.5252	10.9187	11.59	11.0559
43067	CHKov1	7.06591	6.92211	8.03878	9.59903	9.46492	10.2071
43084	CG5107	12.4465	12.5029	12.2573	8.22301	3.8802	2.94842
43087	msi	10.1029	9.83016	9.82299	8.85849	8.5762	9.0335
43101	CG4743	5.29837	5.69471	5.89823	3.92227	4.69003	4.4241
43136	CG42235	8.1623	8.96523	8.45822	7.27906	6.40091	7.79986
43156	E(spl)m3-HLH	8.08487	8.46127	7.8455	9.58597	9.31574	9.68089
43165	Dak1	10.8239	10.2145	9.97757	7.54573	7.08723	6.12806
43230	SPARC	10.511	10.4899	10.1678	8.99805	9.1831	8.95861
43243	CG14253	3.65914	3.60527	3.46808	4.22166	4.46983	5.28564
43246	CG6296	3.21551	3.45893	5.18692	2.2167	2.21813	2.23378
43247	CG6295	13.1625	13.2601	13.2283	10.3925	7.43584	2.70226
43248	CG17192	11.6123	11.8987	11.9594	6.33161	1.86298	1.87128
43249	CG17191	2.06104	2.0301	2.00759	3.72792	3.17982	6.23862
43251	CG6277	9.42845	9.00006	11.1121	12.654	12.549	12.8166
43252	CG6271	2.49802	2.21252	3.01623	5.87118	6.01101	6.34298
43259	Cpr97Eb	7.50474	8.50134	7.17029	2.68089	1.92138	1.93372
43261	CG14259	10.3758	10.9762	10.6501	7.44221	5.72542	6.01791
43263	CG17189	3.04843	3.1492	4.23363	2.18222	2.12311	2.1405
43264	CAH9	8.25287	9.02785	9.05781	7.75102	7.29497	8.16725
43305	Gr98a	2.43442	2.47405	2.42401	3.59753	4.52024	3.5169
43311	CG5646	8.14584	7.74813	8.22177	9.32015	9.97931	9.44883
43312	wdb	4.22115	6.17735	7.13328	10.5274	10.0745	10.1916
43316	CG5612	6.54429	6.27168	6.66513	7.22947	7.84452	7.72047
43323	Mlc1	13.5653	13.8647	13.8055	12.6366	12.1024	12.0747
43328	CG12880	8.48095	8.1245	8.63321	5.25486	4.45168	4.85511
43383	fkh	5.80538	6.49965	6.49962	7.80195	8.44938	8.39621
43390	Sid	4.51927	3.62277	5.6131	9.03088	9.20566	10.1657
43391	snu	11.8352	11.759	11.7432	10.7047	10.599	10.5904
43394	CG10000	2.18544	2.3437	2.17561	7.38594	7.46463	8.47724
43437	Pdhb	12.493	12.6626	12.4285	11.6255	11.2117	11.2023
43463	CG11951	3.72132	4.21592	4.55681	5.03364	5.62973	5.93147
43475	CG2010	5.87938	6.73534	5.46362	3.85362	3.69026	3.7837
43479	CG7567	7.93517	8.45032	8.69056	3.41912	5.13122	3.36229
43488	Obp99a	11.2019	10.6827	12.2241	8.24287	8.71891	9.95521
43497	Obp99b	10.8397	10.9377	12.5385	7.86624	9.16996	9.21725
43528	Cad99C	9.03284	9.23568	9.43657	5.61525	5.26449	4.91496
43533	Zip99C	11.0498	11.3773	11.1281	12.0281	12.3711	12.1614
43538	CG15515	4.42363	4.66493	4.81599	2.55383	2.41372	2.40015
43545	Jon99Ci	13.2967	13.3111	13.5464	11.7341	5.85189	2.49435
43587	Mlc2	13.4904	13.6965	13.6719	12.4401	11.6408	11.7463
43591	CG9747	9.38068	8.99904	9.27871	7.19515	6.32216	6.05488
43593	CG9743	8.08909	8.44493	8.76766	11.7759	11.7871	12.249
43598	CecB	1.73207	1.71185	3.71406	8.8848	9.51641	8.7692
43599	CecC	4.01633	2.37212	10.373	12.9681	13.2435	13.2945
43602	CG9682	11.6209	11.9894	11.0256	8.99245	7.66527	7.32506
43603	CG18404	10.5492	10.8744	10.4569	8.89206	7.7067	8.98149
43607	CG2217	6.76135	3.84699	6.4927	8.50268	8.52399	9.0034
43612	CG15533	4.69876	4.4722	6.71555	8.23978	8.62881	7.95022
43613	CG15534	10.6151	11.1658	10.5904	9.22412	9.07751	8.65226
43640	PH4alphaPV	8.20714	7.65516	7.19096	4.74253	3.33934	3.27167
43649	Npc2h	8.10632	9.19822	9.47355	9.94262	10.2708	10.8355
43654	cindr	8.64522	8.69718	8.47222	9.54777	10.2078	10.0793
43654	cindr	8.64522	8.69718	8.47222	9.54777	10.2078	10.0793
43657	Cpr100A	10.9064	11.5245	11.2703	6.25409	3.49269	3.08353
43660	CG12071	3.30872	3.16735	3.24364	5.75626	5.14043	6.86015
43670	CanA1	7.61187	7.2185	6.70169	5.40243	5.44653	5.27939
43671	Aph-4	12.4379	12.5367	12.3083	10.8287	11.332	10.693
43678	CG11318	2.82359	2.62027	3.64155	9.43718	8.91815	9.80082
43688	mesh	9.50764	9.4848	9.86763	12.7691	12.7291	12.5748
43699	CG1750	8.13422	8.03455	8.66571	6.31039	6.38066	6.7188
43722	CG1774	9.03945	8.89465	9.04383	7.9341	7.4189	7.32639
43744	Smvt	10.7565	10.7502	10.351	9.36091	9.53121	9.92641
43749	faf	9.23755	8.69909	8.82595	7.76163	8.0818	7.89108
43761	cg2003	10.1455	9.87984	9.65585	8.80935	8.90466	8.6113
43767	ci	10.2485	10.1769	9.83857	8.93662	8.76191	9.01276
43769	pan	2.4636	2.47451	2.46092	3.02979	4.03175	3.6139
43779	yellow-h	8.94872	9.62948	8.83547	8.06323	6.45882	7.56536
43780	CG1674	7.57676	9.4171	8.95624	6.63978	6.43642	6.77439
43780	CG1674	7.57676	9.4171	8.95624	6.63978	6.43642	6.77439
43789	Lin29	5.24309	4.59485	5.02643	2.52287	2.29682	2.30347
43796	Thd1	5.25323	6.09912	5.37172	7.9157	8.07331	8.3087
43800	cg1909	4.34381	5.32987	5.21221	5.734	6.62156	6.63935
43814	bt	13.9866	14.0096	13.9679	12.9203	12.8195	12.6855
43856	nej	4.74545	4.61487	4.42134	7.63858	6.96538	6.93127
43982	Oamb	7.30605	6.77559	5.96067	3.24468	2.93026	3.50704
43991	Pten	10.1199	10.1497	10.127	9.07881	8.74273	9.16538
43999	trbl	7.93676	7.7525	7.39901	9.17451	9.31902	8.65689
44013	sls	9.12415	9.34519	8.75837	4.34806	4.21423	4.08045
44013	sls	9.12415	9.34519	8.75837	4.34806	4.21423	4.08045
44018	cas	5.65566	4.75907	5.1761	4.15341	3.75775	4.52542
44058	Dot	3.53304	3.65172	3.68044	5.15993	5.72656	5.6061
44079	Ag5r2	9.37148	9.53609	10.157	5.11445	2.44071	1.97094
44226	Xbp1	9.65656	9.57577	9.39011	10.4842	10.6742	10.6854
44324	Ms	9.31068	9.54512	9.21502	10.7389	11.0612	10.9021
44359	sda	11.4104	11.4481	11.4095	12.394	12.5829	12.6846
44448	scrib	2.49972	2.44596	2.43081	4.20751	4.30611	4.66595
44505	br	8.80597	7.8923	8.89554	5.59495	5.0021	4.90247
44548	lola	5.34052	4.76272	5.2224	6.84195	6.85451	6.83089
44632	Cyp4e1	8.15824	8.63077	8.13089	5.95906	5.28089	6.73456
44855	rib	5.1526	4.53773	3.12043	2.40535	2.46692	2.46923
45039	Sox100B	3.00831	2.97061	2.79244	5.37947	5.7687	7.04154
45041	Spn43Aa	3.86856	4.33885	5.27975	2.04089	1.9865	1.99988
45320	trol	10.2644	10.3686	10.6862	8.48952	8.34321	8.34737
45382	ogre	9.0409	10.2682	10.5036	8.33356	7.91354	8.18121
45524	Cyp4p1	9.02833	8.93264	8.94919	11.6573	12.1443	12.0635
45574	ida	10.9361	10.6523	10.5061	9.46578	9.14673	9.39051
45880	ImpL3	6.27687	6.07278	6.33122	8.83922	9.58391	9.15604
45883	kar	12.0563	11.9472	11.967	9.686	9.59562	9.5756
45994	fs(1)M3	12.0699	11.7809	11.7474	9.98336	9.4557	9.72227
46017	l(2)01289	10.9896	11.0725	10.8377	8.98206	8.75838	9.23906
46017	l(2)01289	10.9896	11.0725	10.8377	8.98206	8.75838	9.23906
46027	kermit	9.61907	9.41419	9.29402	10.6547	10.7577	10.5645
47065	qsm	9.99326	10.4082	10.6508	9.10769	9.18034	9.05703
47091	comt	10.4905	10.6634	10.664	8.91533	9.32576	8.62578
47408	Vps28	7.97323	8.0685	7.41318	8.91252	9.33825	9.10853
47611	Gpo-1	12.7848	12.7139	12.6005	11.1061	10.9328	10.7155
47895	Nmdmc	8.54134	9.59407	11.1376	12.4368	12.2389	12.1074
48335	GstD2	3.71334	3.24839	5.24713	7.55004	10.124	8.65515
48338	GstD5	3.79912	3.70547	5.62609	8.86604	8.16864	8.29559
48632	Act87E	13.0923	13.1439	13.1385	12.0091	11.3798	11.6146
49080	epsilonTry	12.9125	13.0529	12.9712	10.2309	5.70784	5.81119
49090	RyR	11.1928	10.2649	10.5914	7.52933	7.13111	6.96271
49297	Ca-P60A	11.457	11.5225	11.5161	10.4483	10.0606	10.4209
49297	SERCA	14.3576	14.4027	14.3059	13.1113	10.3886	10.7888
49297	Ca-P60A	11.457	11.5225	11.5161	10.4483	10.0606	10.4209
49638	drm	2.83431	3.13381	3.42	6.01897	5.9067	6.28486
49803	Spn55B	8.8383	9.18072	9.24416	11.5624	11.7172	11.7858
49805	Spn42Da	11.2315	11.1998	11.2686	12.3834	12.578	12.56
49808	Spn42Dd	4.86109	4.19571	5.74865	7.47333	7.46551	7.6421
49815	Cht4	3.91991	4.46297	8.80368	12.0579	11.8665	12.5436
50005	CG8369	11.8507	11.9863	12.2142	13.2144	13.2516	13.2405
50024	CG11686	5.29203	3.89456	4.67064	8.18428	8.47057	8.59716
50050	CG17278	9.25318	9.66538	10.0023	10.9714	11.1688	10.8884
50055	CG5791	8.73554	6.75362	9.22265	4.88853	3.52229	3.42956
50061	CG13841	4.67779	5.35103	4.83456	5.86962	7.28336	6.70218
50110	CG11458	12.7677	13.2343	12.8943	10.319	2.62562	2.85758
50178	ND-B8	5.27651	5.69739	5.31694	4.37261	4.23303	4.0845
50191	CG15353	6.55235	6.50863	6.92278	3.64247	2.16521	2.21563
50196	CG5011	10.1267	10.4321	10.5376	12.2313	12.3556	12.5841
50203	CG15127	2.8417	3.35526	4.71743	8.56097	8.54577	9.2543
50206	CG15068	11.347	11.9866	11.6329	12.809	12.556	13.1261
50207	CG15065	9.75593	10.3121	10.8893	11.6725	12.1007	11.9103
50208	CG16836	9.85426	10.1437	10.4383	11.3454	11.4874	11.8051
50281	BobA	4.37933	4.135	4.64883	2.58355	2.51708	2.55379
50323	CG15210	10.6791	10.5609	10.6253	12.7179	12.9582	12.9076
50358	Diedel3	9.87011	10.1376	8.99923	2.56172	1.8558	1.91911
50432	Peritrophin-15b	3.89909	3.02109	4.13404	8.84411	8.95738	9.17819
50433	Peritrophin-15a	7.44254	7.10951	7.48066	8.97795	9.38181	9.59342
50442	CG14933	10.7907	11.0848	11.4971	12.2966	12.4184	12.5867
50458	CG4440	3.88272	4.77422	4.61737	2.55662	2.56418	2.63051
53444	SC35	5.87026	5.00611	5.43535	3.74457	3.47068	3.65255
53507	Ugt86Dd	8.57365	8.58572	9.27232	10.7576	10.3661	10.9097
53515	Myo28B1	3.94713	3.82433	4.69311	6.40621	7.08523	6.70445
53515	Myo28B1	3.94713	3.82433	4.69311	6.40621	7.08523	6.70445
53550	lectin-24Db	5.78007	7.16035	5.97177	4.38182	4.7079	4.54634
53564	retinin	10.9382	11.6107	11.4123	7.05582	2.58611	2.62946
53579	Dip3	2.60085	2.31011	2.20966	3.60052	3.59806	3.58943
59141	CG18745	2.05773	1.98994	2.04905	5.50538	6.22572	6.37407
59142	CG18746	2.52958	2.61613	2.5006	4.63354	5.24	5.93589
59143	CG18747	2.65596	2.66124	2.55265	3.92576	4.00332	4.42148
59144	CG18748	3.51902	4.65892	6.24774	8.20453	8.83872	8.63718
59158	Cpr65Au	11.9219	12.1267	12.1963	7.99012	3.80308	4.54819
59217	CG18869	2.74786	2.5325	3.30811	7.13861	7.38217	7.97957
59235	Nplp3	12.5216	13.01	13.0715	10.0813	2.21151	2.26704
59240	GstD10	5.29627	6.20559	8.13307	9.61549	10.2308	9.61008
117462	TotC	9.98554	11.8537	13.4444	14.3177	14.2019	14.519
192535	CG32032	8.62473	9.45784	9.72797	11.2911	11.5835	11.41
246398	CG30025	9.15104	10.1208	9.9269	2.98489	2.24349	2.18248
246398	CG30025	9.15104	10.1208	9.9269	2.98489	2.24349	2.18248
246399	CG30026	11.2993	11.6749	12.1169	13.4446	13.4978	13.5614
246404	deltaTry	2.89193	3.22364	4.38091	11.6277	12.485	12.1841
246406	CG30033	4.4118	5.13088	4.95185	3.63641	3.5341	4.01987
246414	CG30047	4.42248	4.93272	3.26887	2.48565	2.55349	2.44146
246456	CG30098	2.10915	2.14227	2.21501	9.24911	9.64094	11.0483
246484	CG30151	9.79571	10.4291	10.7159	11.2674	11.4091	11.3462
246487	CG30154	4.13137	5.10741	5.03601	5.62325	6.15546	6.20661
246519	MFS1	5.74469	6.60281	4.56463	1.84943	1.86811	1.87556
246528	rap	6.12101	6.60181	6.55233	7.60859	7.7913	7.77457
246550	CG30340	7.20091	7.06924	7.03773	5.902	5.77608	6.15786
246581	GstE9	8.42571	8.81158	9.30163	10.085	10.1375	10.4992
246606	CG30424	9.11741	9.18483	9.32945	11.7375	11.9088	11.8973
246629	CG30466	6.46545	6.22056	5.79964	7.65943	7.41531	7.67792
261617	CG31777	5.19488	4.90963	4.91625	6.68677	6.05148	6.38553
261621	CG31706	2.1502	2.70611	2.99312	4.18867	5.19956	4.90019
261628	CG31469	1.85339	1.84947	1.83756	3.07515	4.37563	3.34685
261629	Unc-115a	9.88251	9.8078	9.71953	10.7064	10.9185	10.9346
317825	CG32021	4.64936	4.60634	4.89682	8.37785	8.48294	8.46153
317827	CG32023	5.15984	5.03459	5.55429	8.47407	9.42427	9.07222
317852	eap	7.34431	7.0716	7.73324	5.35119	5.40067	5.30835
317862	CG32115	4.40444	4.6556	5.6446	6.29371	6.84722	7.73222
317900	edin	2.29175	2.2877	4.98785	10.7673	9.30124	10.8052
317997	CG32368	9.7724	10.0687	10.9692	14.0375	14.2415	14.191
318000	Ank2	3.28146	3.02207	3.11218	4.87495	4.83203	4.8662
318046	mthl14	7.81805	8.5614	8.79259	11.5288	11.5409	11.879
318050	CG32483	6.81286	7.58271	8.43775	1.977	1.95746	1.97274
318128	CG32625	10.2523	9.81138	9.65818	9.46221	8.55279	8.53729
318133	snmRNA:204	10.8743	11.3614	11.2289	12.1809	12.134	12.2444
318137	CG32642	12.4863	12.7726	12.7416	10.3331	7.53406	2.32688
318139	Mur11Da	10.5677	11.315	11.3751	7.80743	2.43253	2.32742
318160	CG32706	2.26698	2.27968	2.22768	4.66125	4.47397	2.77132
318583	CG31077	6.97511	7.6164	7.75139	8.39883	8.65989	8.51595
318587	scrib	2.49972	2.44596	2.43081	4.20751	4.30611	4.66595
318591	CG31091	3.70857	2.84419	4.73729	2.23881	2.21956	2.23248
318651	CG31267	7.86438	8.26657	8.13706	5.98286	6.06172	5.74921
318653	CG31269	3.99691	6.09056	6.35556	2.22966	2.20463	2.23666
318664	CG31288	8.70088	8.63212	8.31781	6.53161	6.00007	5.75779
318681	CG31321	6.84389	7.56557	7.39232	2.67508	2.36343	2.6308
318682	CG31086	6.9904	7.99307	9.23256	11.2263	11.2627	11.2121
318721	Gba1b	2.05359	2.07032	2.78165	2.86695	3.66979	4.30743
318725	Takl1	3.01244	3.28189	3.33566	10.1929	10.1856	10.5478
318734	CG31436	10.2365	10.3106	10.424	11.3953	11.6141	11.6639
318794	CG31548	10.5539	10.7933	11.197	9.82197	9.80499	9.86978
318843	CG43394	6.51199	6.76356	6.65299	5.46017	5.45573	5.65219
318846	His4	12.255	12.1847	11.8558	13.9736	13.8306	13.8931
318847	His3	2.18529	2.06301	1.97652	11.6859	10.4596	10.6211
318847	His3	2.18529	2.06301	1.97652	11.6859	10.4596	10.6211
318857	CG33082	10.229	10.1756	10.9092	11.8573	11.6782	11.9005
318872	CG34126	6.27226	5.96704	5.92246	7.9802	6.94687	7.62311
318882	CG31681	11.4028	11.7293	12.2947	10.7561	9.73756	10.8134
318884	CG31685	10.0142	10.9657	10.1565	12.1415	12.359	12.4661
318885	CG4267	9.36426	9.10744	9.75701	10.2824	10.3834	10.7317
318893	CG33127	8.44075	9.61134	9.04362	9.9812	10.1653	10.1318
318906	CG31704	9.73288	9.95841	9.8488	10.6782	11.0865	11.4438
318910	CG43672	11.0131	11.9742	11.9283	5.98125	3.09177	2.03456
318913	CG33178	10.9288	11.1267	10.9447	9.41874	9.30765	9.5048
318914	mthl15	2.57413	2.45079	2.40174	4.61289	5.47901	6.36834
318914	mthl15	2.57413	2.45079	2.40174	4.61289	5.47901	6.36834
318934	CG31769	10.4035	10.6704	11.2005	11.9988	12.0671	12.2545
318954	CG31809	4.61485	4.60861	4.60529	5.92792	7.08731	6.0993
318954	CG31809	4.61485	4.60861	4.60529	5.92792	7.08731	6.0993
318970	CG31832	2.47047	2.50015	2.59458	7.3065	6.87746	8.07072
319012	CG31898	7.47751	7.8237	6.88576	10.6461	10.6926	10.8066
319013	CG43394	6.51199	6.76356	6.65299	5.46017	5.45573	5.65219
319014	Mur29B	10.4601	10.873	11.1257	13.755	13.8525	13.8884
319016	Acp1	11.4117	11.5102	11.385	5.2107	2.45042	2.49021
319045	CG31955	10.6739	11.1179	10.7672	11.9634	12.1286	11.9728
319052	CG31975	2.20148	2.43783	2.20553	3.12811	4.14307	2.95045
326118	CG31102	4.95915	4.30293	4.51912	5.62327	5.9948	5.95402
326130	CG31272	10.5091	10.1966	10.1572	11.6113	12.3717	11.5925
326133	CG31343	13.098	13.2569	12.9814	11.4521	11.4383	10.9653
326136	Npc2e	2.34212	2.67003	7.47222	13.3539	13.2426	13.5115
326151	pgant5	12.0208	12.0892	12.059	11.0559	10.7941	10.9931
326160	ninaD	6.65591	6.78268	7.2875	1.99996	2.03086	2.05056
326174	CG31926	11.9789	12.1776	12.1562	9.22711	4.75427	2.06307
326175	CG31928	12.6894	12.8164	12.6842	9.98998	5.50815	2.09019
326185	CG32054	3.27433	3.30161	3.39919	7.43413	7.67996	7.91484
326211	CG32379	4.06496	2.69984	3.02282	1.92226	1.88366	1.9117
326235	Cubn	4.3936	3.92227	4.56287	7.20022	7.05713	7.4982
326257	CG33108	4.2198	4.07359	4.03618	5.46182	5.73299	5.25662
326273	His2B	11.6001	11.31	11.0674	13.2624	12.9865	13.0672
326273	His2B	11.6001	11.31	11.0674	13.2624	12.9865	13.0672
2768679	p38c	5.64791	8.03439	8.18666	11.3617	11.7941	11.724
2768832	CG33469	3.23447	3.41524	4.31941	8.32764	8.67544	8.58234
2768833	CG33468	2.27667	2.24813	2.22325	3.73615	5.15266	4.64919
2768908	CG3857	9.96445	9.81046	9.88797	11.5108	12.0633	11.7915
2768914	CG33307	10.25	10.7467	9.70963	11.3377	10.7929	11.6075
2768994	CG33493	6.37075	6.20751	6.70873	8.17888	7.51075	8.95476
3346141	CG33521	8.15839	10.6119	9.85219	6.0821	5.44149	5.74326
3346201	Unc-89	10.6662	10.9427	10.2128	5.57635	5.36331	5.40716
3346221	lectin-37Db	8.48458	8.2102	8.69391	10.662	10.5184	10.9291
3346238	form3	6.93576	7.22398	7.37082	5.75537	6.40427	5.9145
3354922	CG40198	4.53465	6.6335	6.62199	4.40703	2.87481	3.29147
3354987	tyn	2.71423	3.83617	4.51727	2.3084	2.22476	2.23386
3354994	su(f)	8.68434	7.7835	8.17348	6.94176	7.03107	6.69102
3354995	CG17169	10.063	10.4918	10.3939	5.62424	3.05498	2.98649
3355028	CG40115	2.24482	2.98827	3.38744	5.1629	5.98533	5.70054
3355066	CG17684	5.79119	6.65692	6.64759	8.06359	8.43038	8.60989
3355102	Scp1	14.5505	14.7195	14.5969	13.804	11.2227	11.0462
3355149	CG40298	7.67275	8.49963	8.28615	4.17166	3.26314	3.58283
3355151	scro	3.57442	4.16935	4.19842	5.79538	6.79251	6.13582
3355162	CG40486	5.70823	5.43766	4.94796	3.11588	3.00247	3.33023
3355171	FucTC	6.18005	7.1353	8.27301	4.48173	4.78097	4.8624
3771756	CG10097	9.66022	9.63033	10.1249	3.01387	2.29534	2.31127
3771779	Pex6	8.70125	8.11146	9.41802	7.25966	5.54636	7.47805
3771872	Hsp22	10.6719	11.0634	11.5053	12.2614	12.9389	11.8304
3771923	Kaz1-ORFB	9.18214	9.69974	9.04854	10.5611	11.058	11.1315
3772566	Fuca	6.71175	6.74007	6.64598	8.06289	8.71053	8.70973
3885597	CG34005	2.83982	2.75415	3.23314	6.95762	6.56001	8.25807
3885601	CG34054	4.22857	5.41116	6.54988	9.8216	9.52752	10.0595
3885606	CG34043	8.96168	9.61641	10.5937	11.1044	11.3941	11.2906
3885611	NimB3	4.7442	4.81333	6.55992	7.87781	7.47026	8.88762
3885655	CG34040	3.15127	5.95759	4.51976	7.98166	8.44146	7.91067
3885655	CG34040	3.15127	5.95759	4.51976	7.98166	8.44146	7.91067
4379892	CG34136	4.75262	4.97051	6.64694	10.0924	9.26171	9.83206
4379909	BG642312	6.08022	7.07162	6.42062	2.57227	3.4587	2.91318
4379919	CG17698	7.48881	8.30701	8.13139	9.76806	9.76737	9.99862
5740183	CG34236	3.79602	5.06544	4.39689	11.7892	12.0656	11.9425
5740195	CG34232	7.66593	7.77509	7.86066	10.8224	11.1207	11.1842
5740215	CG13177	3.13927	3.04651	3.29503	4.22156	5.0249	4.47138
5740234	CG34284	9.69757	9.98377	10.6643	11.0173	11.223	11.1114
5740252	Not1	2.21522	2.11286	2.33911	4.22973	4.26369	3.84149
5740271	Vml	5.04409	7.93438	8.06689	4.62703	4.35324	4.35949
5740310	Nox	9.25087	8.99402	8.99442	7.38552	6.89845	6.23482
5740391	CG34176	5.56055	4.6958	6.22848	9.35186	9.73975	9.8264
5740481	CG34198	4.18078	3.22618	4.30657	5.65371	7.50115	7.16847
5740691	l(2)41Ab	2.48729	2.65655	2.57883	3.86905	4.0965	3.97522
5740746	CG34172	13.8478	14.0467	13.9648	12.9304	12.148	12.0983
5740847	CG17636	3.14838	3.31264	2.30701	4.61067	5.22842	4.82027
7354376	tal-1A	10.0127	10.2934	10.3035	8.7874	8.56937	8.86367
7354424	CG42394	11.1457	11.6123	11.8162	12.4631	12.6904	12.623
8674055	mgl	7.27554	7.80797	7.34466	6.48331	6.35897	6.07093
10178905	CG42826	11.7934	11.7711	12.0502	14.0427	14.1192	14.1904
19836006	CR45033	7.74365	7.90656	8.02637	9.78213	10.3152	9.54523
26067037	CG33939	8.19882	8.43799	8.05606	4.84578	5.38297	4.97265
